1 **Spatial-temporal targeted and non-targeted surveys to assess microbiological**  
2 **composition of drinking water in Puerto Rico following Hurricane Maria.**

3  
4 Maria Sevillano<sup>a</sup>, Solize Vosloo<sup>a</sup>, Irmarie Cotto<sup>a</sup>, Zihan Dai<sup>b, c</sup>, Tao Jiang<sup>a</sup>, Jose M. Santiago  
5 Santana<sup>d</sup>, Ingrid Y. Padilla<sup>e</sup>, Zaira Rosario-Pabon<sup>f</sup>, Carmen Velez Vega<sup>f</sup>, José F. Cordero<sup>g</sup>,  
6 Akram Alshawabkeh<sup>a</sup>, April Gu<sup>h</sup>, and Ameet J. Pinto<sup>a</sup>

7 <sup>a</sup> Department of Civil and Environmental Engineering, Northeastern University, Boston, MA,  
8 USA

9 <sup>b</sup> Key Laboratory of Drinking Water Science and Technology, Research Center for Eco-  
10 Environmental Sciences, Chinese Academy of Sciences, Beijing, China

11 <sup>c</sup> University of Chinese Academy of Sciences, Beijing, China

12 <sup>d</sup> Department of Natural Sciences, University of Puerto Rico, Carolina, PR, USA

13 <sup>e</sup> Department of Civil Engineering and Surveying, University of Puerto Rico, Mayagüez, PR,  
14 USA

15 <sup>f</sup> University of Puerto Rico—Medical Sciences Campus, San Juan, PR, USA

16 <sup>g</sup> Department of Epidemiology and Biostatistics, University of Georgia, Athens, Georgia, USA

17 <sup>h</sup> School of Civil and Environmental Engineering, Cornell University, Ithaca, NY, USA

18

19

20 \*Corresponding author: [a.pinto@northeastern.edu](mailto:a.pinto@northeastern.edu)

21

22

23 **Keywords:** drinking water quality, hurricane Maria, metagenomics, qPCR, genome resolved  
24 metagenomics

25

## 26 Graphical Abstract

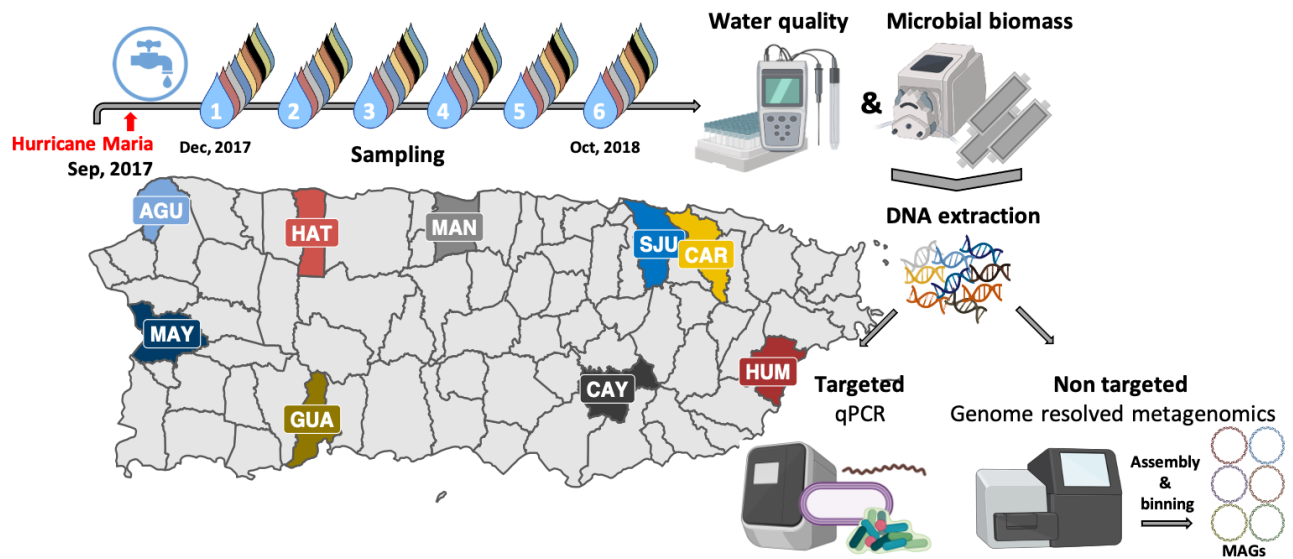

27

28 **Abstract**

29 Loss of basic utilities, such as drinking water and electricity distribution, were sustained for  
30 months in the aftermath of Hurricane Maria's (HM) landfall in Puerto Rico (PR) in September  
31 2017. The goal of this study was to assess if there was deterioration in biological quality of  
32 drinking water due to these disruptions. This study characterized the microbial composition of  
33 drinking water following HM across nine drinking water systems (DWSs) in PR and utilized an  
34 extended temporal sampling campaign to determine if changes in the drinking water microbiome  
35 were indicative of HM associated disturbance followed by recovery. In addition to monitoring  
36 water chemistry, the samples were subjected to culture independent targeted and non-targeted  
37 microbial analysis including quantitative PCR (qPCR) and genome-resolved metagenomics. The  
38 qPCR results showed that residual disinfectant was the major driver of bacterial concentrations  
39 in tap water with marked decrease in concentrations from early to late sampling timepoints.  
40 While *Mycobacterium avium* and *Pseudomonas aeruginosa* were not detected in any sampling  
41 locations and timepoints, genetic material from *Leptospira* and *Legionella pneumophila* were  
42 transiently detected in a few sampling locations. The majority of metagenome assembled  
43 genomes (MAGs) recovered from these samples were not associated with pathogens and were  
44 consistent with bacterial community members routinely detected in DWSs. Further, whole  
45 metagenome-level comparisons between drinking water samples collected in this study with  
46 samples from other full-scale DWS indicated no significant deviation from expected community  
47 membership of the drinking water microbiome. Overall, our results suggest that disruptions due  
48 to HM did not result in significant and sustained deterioration of biological quality of drinking  
49 water at our study sites.

50

51

## 52 **Introduction**

53 A 2015 report on the Safe Drinking Water Act violations in Puerto Rico (PR) indicated high  
54 levels of contaminants such as volatile organic compounds (VOC), total coliform bacteria, and  
55 disinfection by products (DBPs) impacted around 70% of the islands population(NRDC, 2017).  
56 This report recommended investment in drinking water systems (DWSs), including treatment,  
57 distribution system upgrade and maintenance, and source water protection. Such investments are  
58 also important across the US, as the water infrastructure continues to age(ASCE, 2017) and  
59 water quality violations are being increasingly reported(Allaire et al., 2018). Further  
60 complicating the issue of providing regulation compliant water while relying on an aging water  
61 infrastructure is the increasing frequency and intensity of extreme weather events(Estrada et al.,  
62 2015; Goodess, 2012). In the year 2017 alone, Hurricanes Harvey, Irma, and Maria (HM) caused  
63 widespread damages and were categorized as historic billion dollar disasters in the US(NOAA  
64 NCEI, 2020). The resiliency of DWSs during these extreme events is particularly important, as  
65 lack of access to safe drinking water may result in further detrimental health impacts. Natural  
66 disasters can contaminate source waters, impacting proper treatment, distribution, and ultimately  
67 affect consumer health(Ashbolt, 2015; Exum et al., 2018) Previous studies have highlighted  
68 water quality degradation associated with extreme weather events like hurricanes. Schwab et al.  
69 measured concentrations of faecal coliforms, E. coli, and enterococci in tap and surface waters  
70 following Hurricane Katrina and did not recover any of the bacterial indicators in tap water  
71 samples irrespective of chlorine residual concentration(Schwab et al., 2007). A recent study on  
72 the impacts of Hurricane Harvey on water quality from two DWSs in Texas highlighted that  
73 source water quality and water demand and their relationship to water age strongly impacted  
74 microbial communities and influenced the time for recovery(Landsman et al., 2019). Similarly, a  
75 amplicon-sequencing based study carried out in St. Thomas, post Hurricane Irma and HM  
76 revealed that the microbial community structure in rain cisterns, coastal stations, and surface  
77 runoff waters was dramatically different between sampling sites with faecal indicator bacteria  
78 (FIB) detected in cisterns used as household water supply(Jiang et al., 2020).

79

80 HM, classified as a category 4 hurricane, impacted 3 million people in PR. Loss of basic utilities  
81 (i.e., water, cellular coverage, and electricity) was associated with remoteness category(Kishore  
82 et al., 2018). Water services generally recovered quickly in densely populated areas, while

83 remote areas either recovered quickly or months later. However, electricity services took longer  
84 to recover irrespective of remoteness category. Even when water services were restored,  
85 intermittent water supply was common due to unreliable electrical supply; this could potentially  
86 degrade water quality via stagnation and loss of disinfectant residual, intrusion, and  
87 backflows(Bautista-de los Santos et al., 2019). Boil advisories and point of use chlorination were  
88 in place after water services resumed and were reported by the Puerto Rico Aqueducts and  
89 Sewers Authority (PRASA) through mid-January 2018(Exum et al., 2018). Previously, Lin et  
90 al.(Lin et al., 2020) provided insights into metals, micropollutants, and molecular toxicity of pre-  
91 and post-HM drinking water samples in PR and showed the impact of HM on chemical water  
92 quality, suggesting that trace metals were potential drivers of cumulative risk from drinking  
93 water. Additionally, Keenum et al.(Keenum et al., 2021) characterized five unregulated small  
94 scale DWS and one large PRASA DWS in PR six months after HM. In this study, targeted  
95 culture and molecular based analyses (i.e., quantitative PCR (qPCR), 16S rRNA amplicon  
96 sequencing) demonstrated similar microbial communities and concentrations of opportunistic  
97 premises plumbing pathogens (OPPPs) compared to those reported in the continental US. In our  
98 study, we also aim to evaluate the microbial water quality in the aftermath of HM. However,  
99 unlike Keenum et al(Keenum et al., 2021), we conducted a recurrent sampling campaign  
100 beginning in December 2017 spanning nine locations across PR for a duration of a year. Despite  
101 the magnitude of HM in PR, there hasn't been a large effort to characterize microbial water  
102 quality. To date, there have been two reports focused on chemical contamination(Lin et al., 2020;  
103 Warren, 2019) and two (including this one) on microbial composition(Keenum et al., 2021) of  
104 DWDs on the island. These studies are essential to establish relationships, sampling  
105 infrastructure, and methodologies needed to respond to future storms, as well as to communicate  
106 risk and execute corrective actions to decrease exposure risk and unwanted health outcomes.  
107 Thus, our goals were (1) to utilize an extended spatial-temporal sampling campaign to determine  
108 if changes in drinking water microbiome were indicative of disturbance followed by recovery,  
109 (2) if this disturbance-recovery dynamic was associated with presence of potential pathogens, (3)  
110 whether potential pathogen presence was persistent or transient, and finally (4) whether  
111 microbial composition of PR drinking water was consistent with or deviated significantly from  
112 other drinking water systems.

113

## 114 **2. Materials and methods**

115 **2.1 Drinking water sampling and water quality analyses.** Nine sampling locations were  
116 chosen across different geographic locations in PR. Tap water was filtered in triplicate on site  
117 through 0.2  $\mu\text{m}$  Sterivex filters (EMD Millipore™, Cat. no. SVGP01050) using a field peristaltic  
118 pump (Geotech, Cat. no. 91352123) until the filter clogged or up to a 20L volume for each filter.  
119 Water quality parameters (i.e., temperature, pH, conductivity, and dissolved oxygen) were  
120 recorded on site with an Orion Star probe (Thermo Scientific, Cat. no. 13645571). A portable  
121 spectrophotometer (HACH, Cat. no. DR1900-01H) was used to measure Total chlorine (HACH,  
122 Cat. no. 2105669) and phosphate (HACH, Cat. no. 2106069) on site. Nitrogen species (i.e.,  
123 ammonia, nitrate, nitrite) were measured in the laboratory with a HACH spectrophotometer  
124 using HACH test and tube format (HACH, Cat. no. 2606945, 2605345, 2608345, respectively).  
125 Total Organic Carbon (TOC) was measured with a Shimadzu TOC- LCPH Analyzer (Shimadzu,  
126 Kyoto, Japan). Additional details about the 54 samples can be found in Table S1.

127  
128 **2.2 DNA extraction, qPCR and shotgun sequencing.** DNA extractions were performed using a  
129 modified version of the DNeasy PowerWater Kit (QIAGEN, Cat no. 14900-50-NF)  
130 protocol (Vosloo et al., 2019). Briefly, the polyethersulfone (PES) membrane from the Sterivex  
131 filter was processed by aseptically cutting it into smaller pieces and transferring to a Lysing  
132 Matrix E tube (MP Biomedical, Cat. no. MP116914100). Subsequently, 294  $\mu\text{L}$  of 10X Tris-  
133 EDTA buffer pH 8 (G-Biosciences, Cat. no. 501035446) was added to the Lysing Matrix E tube  
134 and supplemented with 6  $\mu\text{L}$  of lysozyme (50 mg  $\text{mL}^{-1}$ , Thermo Fisher Scientific, Cat. no.  
135 90082), followed by a 60 min incubation at 37°C with mixing at 300 rpm. Subsequently, 300  $\mu\text{L}$   
136 of PW1 solution from DNeasy PowerWater Kit was mixed in and 30  $\mu\text{L}$  of Proteinase K (20 mg  
137  $\text{mL}^{-1}$ , Fisher Scientific, Cat. no. AM2546) was added. An incubation period of 30 min at 56°C  
138 with mixing at 300 rpm followed. Previously removed spheres from the corresponding Lysing E  
139 matrix tube were replenished and 630  $\mu\text{L}$  chloroform: isoamyl alcohol (Fisher Scientific, Cat. no.  
140 AC327155000) was added. Bead beating was performed at setting 6 for 40 seconds using a  
141 FastPrep – 24™ (MP Biomedical, Cat. no. 116004500). The resulting homogenized mixture was  
142 centrifuged for 10 min at 14,000 x g at 4°C and the upper aqueous phase was transferred to a  
143 clean 1.5 mL tube. A supplement of 6  $\mu\text{L}$  carrier RNA (prepared by mixing 310  $\mu\text{L}$  of Buffer EB  
144 from DNeasy PowerWater Kit with 310  $\mu\text{g}$  lyophilized carrier RNA (QIAGEN, Cat. no.

145 1068337)) was mixed with 600  $\mu$ L of recovered supernatant. This was then purified using the  
146 automated DNA purification protocol with DNeasy PowerWater Kit on a QIAcube system  
147 (QIAGEN, Cat. no. 9001292). In addition to the samples, controls were processed identically and  
148 consisted of unused transported Sterivex filter membranes (filter blank), no input material  
149 (reagent blank), and sterilized deionized water filtered through Sterivex (water blank). This set of  
150 three controls were included with each sampling campaign (n=6) and extraction run.

151  
152 qPCR was performed on a QuantStudio™ 3 Real-Time PCR System (ThermoFisher Scientific  
153 Cat. no. A28567). PCR reactions were carried out in a 20  $\mu$ l volume containing Luna Universal  
154 qPCR Master Mix (New England Biolabs, Inc., Cat. no. NC1276266), F515  
155 (GTGCCAGCMGCCGCGGTAA) and R806 (GGACTACHVGGGTWTCTAAT) primer  
156 pair (Caporaso et al., 2011) (IDT), DNase/RNase-Free water (Fisher Scientific, Cat. no.  
157 10977015), and 5  $\mu$ L of 10X diluted DNA template. Reactions were prepared by an epMotion  
158 M5073 liquid handling system (Eppendorf, Cat. no. 5073000205D) in triplicate. The cycling  
159 conditions were as follows, initial denaturing at 95 °C for 1 min followed by 40 cycles of  
160 denaturing at 95 °C for 15 s, annealing at 50 °C for 15 s, and extension 72 °C for 1 min. Melting  
161 curve analyses was performed by ramping from 72 °C to 95 °C for 15 s, and 60 °C for 1 min, 95  
162 °C for 15 s. A negative control (NTC) and a standard curve consisting of 7 points ranging from  
163  $10^1$ - $10^7$  copies of 16S rRNA gene were included in every qPCR run. Genomic DNA from  
164 selected samples were sent to University of Illinois Roy J. Carver Biotechnology Center (UI-  
165 RJCBC) for library preparation using a low input DNA kit (NuGEN, Cat. no 0344NB). Libraries  
166 were loaded into two SP lanes on a NovaSeq 6000 instrument with an output of 2x150nt reads.  
167 The prepared libraries included 33 samples and 3 pooled blanks (i.e., filter blank, reagent blank,  
168 and water blank) from all locations.

169  
170 **2.3 qPCR analyses for waterborne pathogens.** Previously published primers targeting  
171 *Legionella* spp. (Nazarian et al., 2008; Yáñez et al., 2005), *Mycobacteria* spp. (Chern et al., 2015;  
172 Radomski et al., 2010), pathogenic *Leptospira* (Stoddard et al., 2009), and *Pseudomonas*  
173 *aeruginosa* (Anuj et al., 2009) were used for qPCR assays. Reactions were set up by an  
174 epMotion M5073 liquid handling system in triplicate. The assays consisted of 2X PrimeTime  
175 Gene Expression Master Mix (IDTDNA, Cat no. 290479057) with low reference ROX dye,

176 target primers and probe (IDTDNA), 10-fold diluted template and water (UltraPure™  
177 DNase/RNase-Free Distilled Water, Thermo Fisher Scientific, Cat. no. 10977015). Single target  
178 reactions were conducted in a total volume of 20 µL, whereas duplex qPCR (i.e., *Pseudomonas*  
179 *aeruginosa* assay) were conducted in 25 µL. Primer and probe sequences and cycling conditions  
180 are described in Table S2. Standard cycling conditions for all reactions were programmed on a  
181 QuantStudio™ 3 Real-Time PCR System. Target gene copy numbers were determined by  
182 comparing threshold cycle with standard curve generated using gblocks gene fragments as  
183 standards (Table S2).

184

185 **2.4 Metagenomic reads pre-processing.** The raw reads obtained from UI-RJCBC were  
186 processed with fastp(Chen et al., 2018) v0.19.7 to remove homopolymer stretches using the  
187 following flags ‘--trim\_poly\_g --trim\_poly\_x’. Further, trimmed reads were mapped with BWA-  
188 MEM(Li, 2013) v0.7.12 against the UniVec database build 10.0 (National Center for  
189 Biotechnology Information 2016) to perform vector screening and retained unmapped paired  
190 reads. Subsequently, Nonpareil(Rodriguez-R et al., 2018) v3.303 was used on the quality filtered  
191 reads to estimate average community coverage and metagenomic dataset diversity using kmer  
192 algorithm with a kmer size of 20 and default parameters.

193

194 **2.5 Metagenome assembly and mapping.** Sample reads were co-assembled based on each  
195 sampling location using metaSPAdes(Nurk et al., 2017) v 3.11.1 with the following flags ‘-meta  
196 -t 16 --phred-offset 33 -m 500 -k 21,33,55,77,99,119’ and further filtered to a minimum scaffold  
197 length of 500 bp. Reads from samples and controls (i.e., extraction blank, filter blank, DI water  
198 blank) were mapped to co-assemblies using BWA-MEM. An approach similar to Dai et al.(Dai  
199 et al., 2020) was used to remove potential contaminant scaffolds. Briefly, BWA-MEM with flag  
200 -F4 and -f2 was used to map sample and control reads against co-assemblies. The  
201 BEDtools(Quinlan and Hall, 2010) genomecov using flags -g, and -d was used to calculate  
202 coverage and per base coverage using generated BAM files. Relative abundances (RA) and  
203 normalized coverage deviation (NCD) were calculated for each scaffold with coverage and per  
204 base coverage information, respectively. Scaffolds that were not detected in the blanks or for  
205 which sample RA was greater than the blank RA and the sample NCD was less than the blank  
206 NCD were considered true scaffolds and were used in downstream analyses. All scaffolds that



207 did not meet these criteria were considered contaminant scaffolds and removed from further  
208 analyses. Assembly statistics were obtained from QUAST(Gurevich et al., 2013) 5.0.2. To  
209 contextualize the metagenome assemblies with respect to other distribution systems, assemblies  
210 from other drinking water systems (considered unperturbed systems because samples were not  
211 associated with any natural disaster or water quality issues) were compared against our co-  
212 assemblies. MASH(Ondov et al., 2016) v2.1.1 was used to estimate the dissimilarity between  
213 assemblies using ‘-r’ and ‘-m 2’ flags, and a sketch size of 100000.

214

215 **2.6 Taxonomic classification of metagenomic assemblies.** The taxonomic classification of  
216 scaffolds was performed with a contig annotation tool(Von Meijenfeldt et al., 2019) (CAT  
217 v5.0.4) program in which open reading frames (ORF) are predicted with Prodigal(Hyatt et al.,  
218 2010) and used as alignment queries by DIAMOND(Buchfink et al., 2014) against the NCBI  
219 non-redundant (nr) protein database (downloaded <ftp://ftp.ncbi.nlm.nih.gov/blast/db/FASTA/>,  
220 2020-03-04). Selected genera known to contain pathogenic species, as well as non-pathogenic  
221 species, that are relevant to drinking water systems were further examined. The CAT annotations  
222 of true scaffolds were evaluated against annotated controls and only scaffolds with rpoB  
223 normalized coverage above controls and additional annotation support were considered to avoid  
224 false positives at the genus level. Specifically, additional support consisted of classification with  
225 kaiju(Menzel et al., 2016) v1.7.2 using reference indexes containing NCBI BLAST nr database  
226 and microbial eukaryotes with default parameters (downloaded <http://kaiju.binf.ku.dk/server>,  
227 nr\_euk 2019-06-25) and/or by kraken2(Wood et al., 2019) v2.0.9-beta against RefSeq database  
228 (downloaded [https://lomanlab.github.io/mockcommunity/mc\\_databases.html](https://lomanlab.github.io/mockcommunity/mc_databases.html)). Additionally, we  
229 examined the scaffolds of eukaryotic origin with metaEuk(Levy Karin et al., 2020) v3.8dc7e0b  
230 to assign taxonomy using a publicly available MMseqs2 database containing protein profiles  
231 from the marine eukaryotic reference catalogue (MERC), Marine Microbial Eukaryote  
232 Transcriptome Sequencing Project (MMETSP), and Uniclust50 (downloaded  
233 [http://wwwuser.gwdg.de/~compbiol/metaeuk/2020\\_TAX\\_DB/](http://wwwuser.gwdg.de/~compbiol/metaeuk/2020_TAX_DB/)).

234

235 **2.7 Metagenomic assembled genomes.** Co-assemblies were binned with CONCOCT(Alneberg  
236 et al., 2014) within anvi'o(Eren et al., 2015) v5.1 by clustering scaffolds 2500 bp or longer into  
237 metagenome assembled genomes (MAGs) and manually refining them within the anvi'o

238 platform. Furthermore, dRep(Olm et al., 2017) v2.3.2 was used to dereplicate MAGs and obtain  
239 representative genomes with flags ‘-comp 50 -con 10’ and default values. GTDB-tk(Parks et al.,  
240 2018) v0.1.3 was used to assign taxonomy to MAGs with the flag ‘classify\_wf’. Sample reads  
241 were mapped to corresponding single pseudo contig MAGs. Pseudo contigs were generated with  
242 the union command in EMBOSS(Rice et al., 2000) utility. Mapping was performed with  
243 BBSMap(Bushnell, 2015) v38.24 using a 90% identity threshold and setting flags  
244 ‘ambiguous=best’, ‘mappedonly=t’, and ‘pairedonly=t’. Detection of a MAG in a sample was  
245 established when  $\geq 25\%$  of its bases were covered by at least one read from the corresponding  
246 sample. Coverage was determined with samtools(Li et al., 2009) v1.10 ‘coverage’ . The  
247 abundance of a MAG in a sample was calculated as sample reads mapped per million reads per  
248 genome length in kbp (RPKM). Further information about MAGs, such as number of 5S rRNA,  
249 16S rRNA, 23S rRNA, and tRNA counts was obtained by annotating the MAGs using  
250 DRAM(Shaffer et al., 2020) v1.0.6. The databases used with DRAM were downloaded with the  
251 following flags ‘DRAM-setup.py prepare\_databases --output\_dir DRAM\_data --skip\_uniref’.  
252 MAGs from this study were compared to 52,515 MAGs recovered from environmentally diverse  
253 metagenomes by Nayfach et al.(Nayfach et al., 2020) (downloaded  
254 <https://portal.nersc.gov/GEM/genomes/fna.tar>, 2020-11-10) using FastANI(Jain et al., 2018)  
255 v2.3.2 with default parameters. Metadata linked with this genomic catalogue of earth  
256 microbiomes, hereafter referred to as JGI MAGs (downloaded  
257 [https://portal.nersc.gov/GEM/genomes/genome\\_metadata.tsv](https://portal.nersc.gov/GEM/genomes/genome_metadata.tsv), 2020-11-30) was used to address  
258 niche association. Further, SEARCH-SRA(Stewart et al., 2015; Torres et al., 2017; Towns et al.,  
259 2014) online portal was used to interrogate the SRA database (246,329 records) by aligning  
260 metagenomic datasets to our MAGs. Only records that mapped 10 or more reads from the SRA  
261 collection were further inspected. The metadata associated with SRA accession numbers  
262 (downloaded <https://s3.amazonaws.com/starbuck1/sradb/SRAMetadb.sqlite.gz>, 2021-04-08) was  
263 incorporated through custom scripts in R software(R Development Core Team, 2016) that rely  
264 on the dbplyr(Wickham et al., 2021) package. Records that were classified as retrieved from  
265 metagenomic library sources and with a whole genome sequence strategy were retained for  
266 analysis. Considering that SRA metadata is user provided, manual curation to ensure consistency  
267 and retrieve the same ecosystem categories as in JGI MAGs metadata was performed. Data with  
268 missing context (lacking information in title or description) were considered as “others” and

269 removed from analyses. The association between a MAG and an ecosystem category was  
270 determined by multiplying the total number of reads from the ecosystem category mapping to the  
271 MAG by the ratio of the number of unique SRA records associated with a MAG and ecosystem  
272 category and the number of unique SRA records within the entire dataset assigned to the  
273 ecosystem category.

274

275 **2.8 Data analyses and statistics.** Statistical analyses were conducted in R and visualizations  
276 generated with `ggplot2`(Wickham, 2011) package. PCA analyses of water quality parameters  
277 were performed with centered and scaled data in R base `prcomp()`. Linear regression models of  
278  $\log_{10}$  (volume normalized 16S rRNA gene copies) against water quality parameters were fit  
279 using base R `lm()`. Pearson correlation between  $\log_{10}$ (volume normalized 16S rRNA gene  
280 copies) and chlorine concentrations (mg/L) was obtained with base R `cor()` and exponential  
281 decay curve with `nls()`. Euclidian distances between pairwise Mash distance of DW  
282 metagenomes was calculated with `vegan`(Oksanen et al., 2015) function `vegdist()` and clustered  
283 with complete linkage method with base R `hclust()`. PCoA ordination of Mash distances was  
284 performed with `ape`(Paradis et al., 2004) function `pcoa()`. Group wise non parametric testing was  
285 performed with R base statistic packages using function `kruskal.test()` or `wilcox.test()`.  
286 Permutational hypothesis testing (n iterations=10000) of differences in group means between  
287 two groups was performed after up-sampling group data to balance observations using  
288 `upsample()` from the `groupdata2`(Olsen, 2021) package. Analyses of variance (ANOVA) was  
289 performed with `aov()` and followed up with post hoc Tukey-Kramer testing using `TukeyHSD()` in  
290 base R.

291

### 292 **3. Results and discussion**

293 **3.1 Bacterial concentrations were associated with water quality parameters, particularly**  
294 **total chlorine concentrations.** Water quality parameters were recorded for each sampling  
295 location and timepoint (Figure1A, Table S1). PCA analyses was conducted to assess whether  
296 water chemistry varied spatially and/or temporally. Nitrogen species were excluded from PCA  
297 analyses as their concentrations were below detection limit at several locations/timepoints and  
298 nitrate concentrations also strongly correlated with conductivity (Pearson's  $R = 0.88$ ,  $p < 0.001$ )  
299 and phosphate concentrations (Pearson's  $R = 0.47$ ,  $p < 0.001$ ). No clear clustering of samples by

300 location or timepoint was observed despite drinking water samples being obtained from variable  
 301 source waters (Figure 1B). For instance, CAY, GUA, and MAN had higher mean and variable  
 302 conductivities compared to other locations, which is consistent with source water type of these  
 303 locations being groundwater. Phosphate, on the other hand, was relatively narrowly distributed  
 304 across samples, and in lower concentration compared to other DW systems (Goody et al., 2015),  
 305 with CAY location consistently higher than other PR locations.  
 306

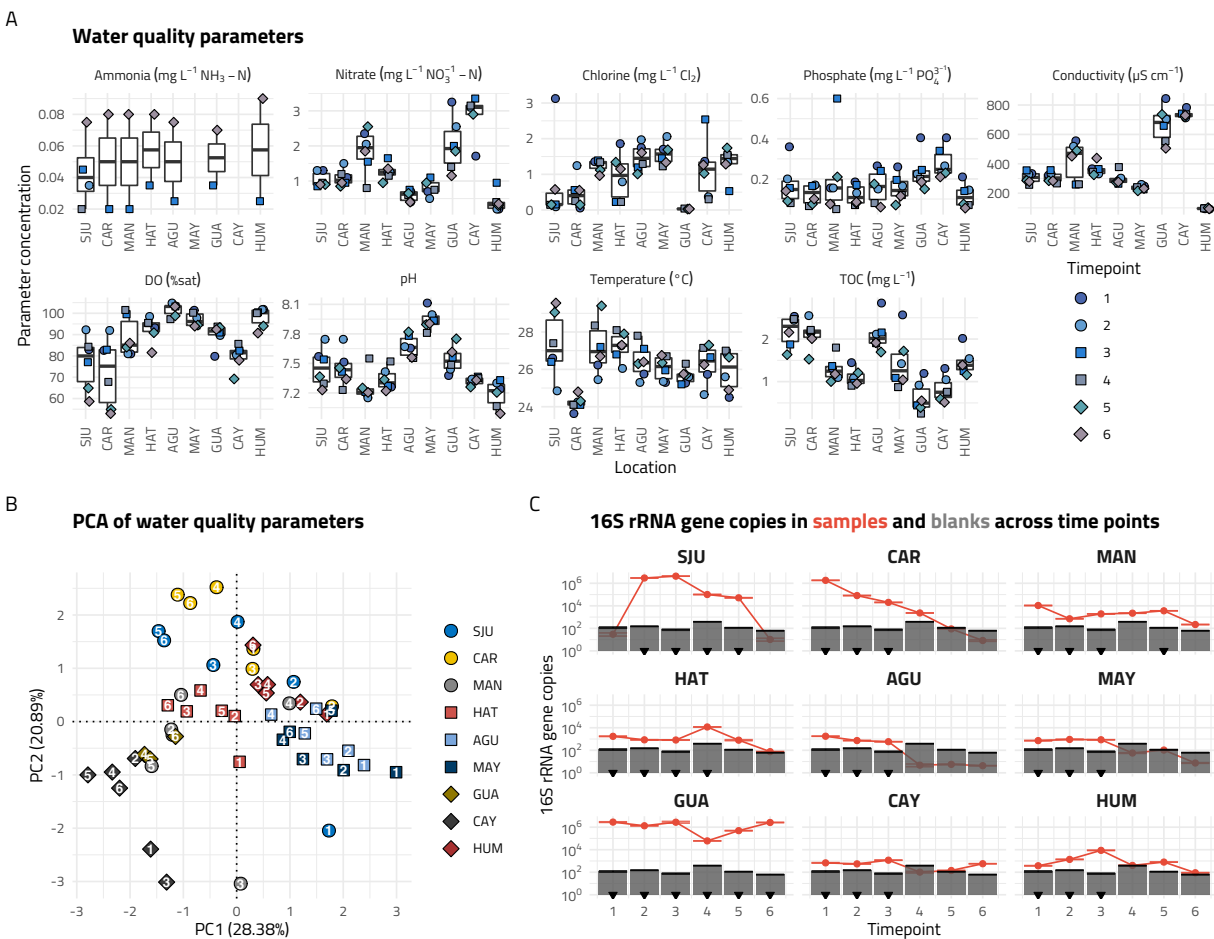

307

308 **Figure 1:** (A) Concentrations of water quality parameters for nine locations from December 2017 to October 2018. Shapes and  
 309 colors correspond to timepoints. All nitrite measurements were below detection limit (BDL, not shown), for ammonia 36  
 310 measurements were BDL, and for chlorine 3 samples were BDL. (B) Principal component analyses of water quality parameters.  
 311 Colors and shapes correspond to sampling location. Direct labels of timepoints within sampling location, in white. The PCA does  
 312 not show a clear clustering between samples or timepoints. (C) Gene copies of 16S rRNA gene for samples and blanks. Red  
 313 lines correspond to samples and grey bars correspond to blanks. Comparison between samples and blanks guided sample  
 314 selection for sequencing. Inverted black triangles denote samples that were sequenced.  
 315

316 We quantified the abundance of 16S rRNA genes in all samples as a measure of bacterial  
317 concentrations (Figure 1C). The average PCR efficiencies for these qPCR assays was  $90 \pm 2.9\%$ .  
318 Volume normalized 16S rRNA gene copies ( $16S \text{ rRNA gene copies mL}^{-1}$ ) ranged from  $6.4 \times 10^{-2}$ -  
319  $9.1 \times 10^4 \text{ copies mL}^{-1}$ . Independently regressing variables in the PCA as descriptors of  $\log_{10}(16S$   
320  $\text{ rRNA gene copies mL}^{-1})$  for each location resulted in six significant ( $p < 0.05$ ) linear models. The  
321 goodness of fit for all models was relatively high with an average adjusted  $R^2$  of  $0.704 \pm 0.062$ ,  
322 and significant associations between  $\log_{10}(16S \text{ rRNA mL}^{-1})$  and DO in CAR, pH in HUM,  
323 temperature in CAR, MAY and GUA, and TOC in AGU. However, regressing parameters  
324 against  $\log_{10}(16S \text{ rRNA mL}^{-1})$  for all locations only resulted in statistically significant  
325 associations with temperature (adj  $R^2 = 0.067$ ,  $p < 0.05$ ) and total chlorine (adj  $R^2 = 0.227$ ,  $p <$   
326  $0.001$ ). A multiple linear regression model with all water quality parameters as descriptors of  
327  $\log_{10}(16S \text{ rRNA mL}^{-1})$  ( $n=51$ ), indicated that total chlorine was the major driver associated with  
328 decreasing 16S rRNA gene concentrations (Adj  $R^2 = 0.28$ ,  $p < 0.001$ , Figure 2A, Table S3).  
329 Chlorine concentrations measured in samples were comparable to those reported in other US  
330 studies (Stanish et al., 2016), except for GUA where it was either below detection limit (BDL) or  
331 very low for all timepoints. All samples, except timepoint 1 in SJU, had total chlorine  
332 concentrations below  $3 \text{ mg L}^{-1}$  (Figure 2B, Table S1). The negative relationship between  
333 bacterial load and chlorine concentration is particularly evident for SJU and CAR, where  
334 decreasing total chlorine concentration were associated with increased bacterial concentrations,  
335 relatively stable chlorine concentrations correspond to stable bacterial concentrations, and  
336 absence of chlorine shows high bacterial concentration, respectively (Figure 2B). Not  
337 surprisingly, these results suggest that maintaining chlorine residual is critically important for  
338 ensuring low bacterial concentrations which could be particularly challenging due to  
339 infrastructure damage from natural disasters. Some locations did exhibit significant variation in  
340 chlorine concentrations between December 2017 and February 2018 (e.g., SJU, CAR, HAT),  
341 with some of these variations associated with water main breaks (e.g., CAR in December 2017).  
342

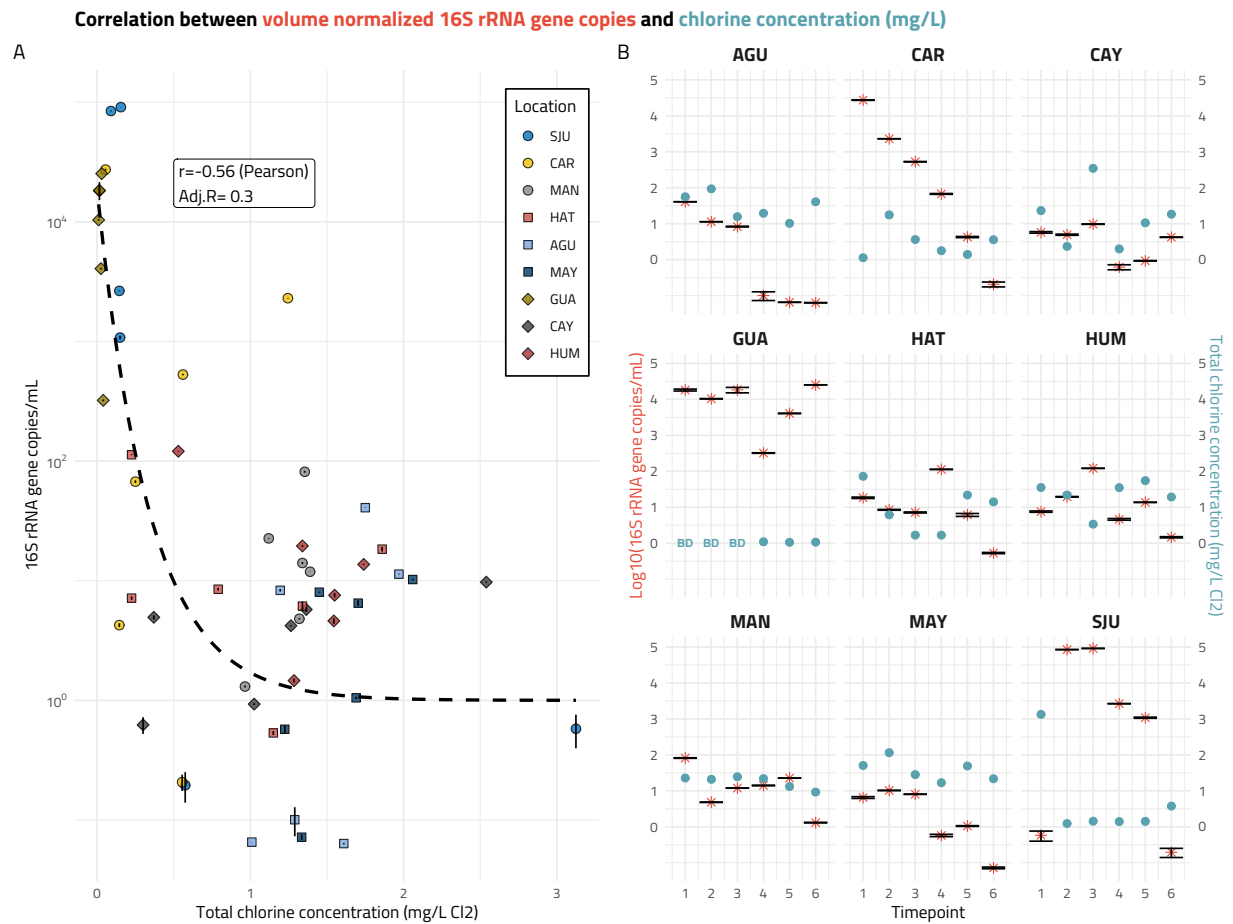

343

344 **Figure 2:** (A) 16S rRNA gene copies normalized by volume correlated with total chlorine concentration. Colors and shapes  
 345 correspond to sampling location. Total chlorine concentration was the major driver among all recorded water quality parameters  
 346 when all samples were aggregated in a multiple linear regression model. The dashed line corresponds to an exponential decay  
 347 fit characteristic to inactivation of bacteria. (B) Double y-axis plot with the concentration of log 16S rRNA gene copies normalized  
 348 by volume (left, red) and total chlorine concentration (right, blue) by time point faceted by sampling location. Chlorine  
 349 concentrations were compliant with EPA regulation and bacterial concentrations were within range of typical drinking water  
 350 systems. Total chlorine concentration was below detection (BD) at GUA first three timepoints. On a per location basis, clear  
 351 examples of the negative effect of total chlorine can be observed (i.e., SJU, MAN, and GUA), however other parameters may  
 352 drive bacterial concentrations in the remaining locations.

353

354 **3.2 Microbial communities and metagenomes of PR samples were similar to those seen in**  
 355 **other drinking water systems.** Based on total bacteria qPCR results and comparison to blanks,

356 a select number of samples per location were subjected to metagenomic sequencing (n= 33,  
 357 Figure 1C, Table S4). The initial three sampling points for all locations were sequenced, unless  
 358 their 16S rRNA gene copy numbers were below or equal to their matched controls. Further, any  
 359 other sampling point 10-fold or higher 16S rRNA gene copy numbers than the highest observed  
 360 in the controls for corresponding timepoint was sequenced as well. A total of 1.18 Gb raw reads

361 were generated after quality filtering and 1.16 Gb reads were not mapped against UniVec,  
362 resulting in less than 2.6% of the reads being discarded for the majority of samples (n=31), only  
363 2 samples (i.e. HUM\_1, HUM\_2) retained less than 92.5% of the raw reads (Table S4). Within  
364 sample diversity (Nd), as assessed by Nonpareil curves, ranged from 15.33-19.16 (Figure 3A,  
365 Table S5). These indices rely on redundancy of reads in a metagenome to estimate diversity of  
366 metagenome, with higher Nd corresponding to more diverse communities. The Nd values  
367 observed here are consistent with those seen in other chlorinated drinking water systems (Dai et  
368 al., 2020). The spread of observed Nd values within location was larger for GUA, HUM, and  
369 HAT, indicating higher temporal variation in diversity, while low variability in Nd values at  
370 CAR indicative of low temporal differences. Kruskal-Wallis test of Nd by location reveal  
371 significant differences in the median of at least one of the groups ( $p < 0.05$ ), however multiple  
372 hypothesis correction with Dunn test did not identify any significant pairwise differences.  
373 Significant and positive correlations were observed between Nd and pH at AGU ( $p < 0.05$ ), and  
374 Nd and DO at HUM ( $p < 0.01$ ), and significant negative correlations between HAT diversity and  
375  $\log_{10}(16S \text{ rRNA mL}^{-1})$  and CAY diversity and nitrate ( $p < 0.05$  for both locations).

376

377 The reads were subsequently assembled and scaffolds identified as potential contamination were  
378 removed as outlined in the materials and methods section. A summary of statistics for the 9 co-  
379 assemblies that were generated can be found in Table S6. CAT was used to annotate true  
380 scaffolds (i.e., scaffolds retained post contamination analysis) and coverage information allowed  
381 us to obtain per sample profiles (Figure 3B, Table S7). Bacteria generally constituted the largest  
382 portion in the samples from SJU, CAR, GUA, and CAY, with a mean relative abundance (RA)  
383 of  $96.6 \pm 1.72\%$ . In contrast, scaffolds of eukaryotic origin ( $18.5 \pm 19.5\%$ ) and unclassified  
384 scaffolds ( $5.62 \pm 2.85\%$ ) constituted a significant proportion of the community in MAN, HAT,  
385 AGU, MAY, and HUM. The RA of eukaryotic contigs is not consistent within locations,  
386 suggesting high temporal variation of the eukaryotic fraction in the systems. Despite highest  
387 eukaryotic contigs RA at timepoint 1 for AGU and MAY and timepoint 2 at HUM, water quality  
388 parameters at these sites had relatively low temporal variation. On the other hand, MAN had its  
389 highest RA at timepoint three when DO and phosphate concentrations were higher than mean  
390 values. In contrast with other sites with high contribution of eukaryotic contigs, MAN water  
391 source is groundwater. Phosphate concentration is associated with source water type and

392 treatment processes (i.e., corrosion control). Douterelo et al.(Douterelo et al., 2018) compared  
393 metagenomic samples from sites with different source waters and saw dominance of bacteria and  
394 no significant differences in the RA of eukaryotes. Moreover Inkinen et al.(Inkinen et al., 2019)  
395 correlated the presence of phosphate concentrations with active eukaryotes in a chlorinated  
396 groundwater DWDS in contrast with surface waters. At the HAT site, the largest eukaryotic RA  
397 was seen at timepoint 1 consistent with highest chlorine concentration. Disinfection is a driver of  
398 microbial composition in DWS and it likely reduced the contribution of bacterial community in  
399 these samples, resulting in an observed increase in the RA of eukaryotes. We further investigate  
400 the eukaryotic component of the microbial communities identified through CAT with MetaEuk  
401 (Figure S1, Table S8 and S9). MetaEuk based classification indicated that free living amoeba  
402 (FLA) capable of supporting intracellular growth of opportunistic pathogens (e.g., *Vermamoeba*,  
403 *Acanthamoeba*, etc.) were transiently detected at low RAs at CAR, MAN, HAT, AGU, MAY,  
404 CAY, and HUM (Figure S2, Table S9). Waterborne parasites like Giardia and Cryptosporidium  
405 were not detected.  
406



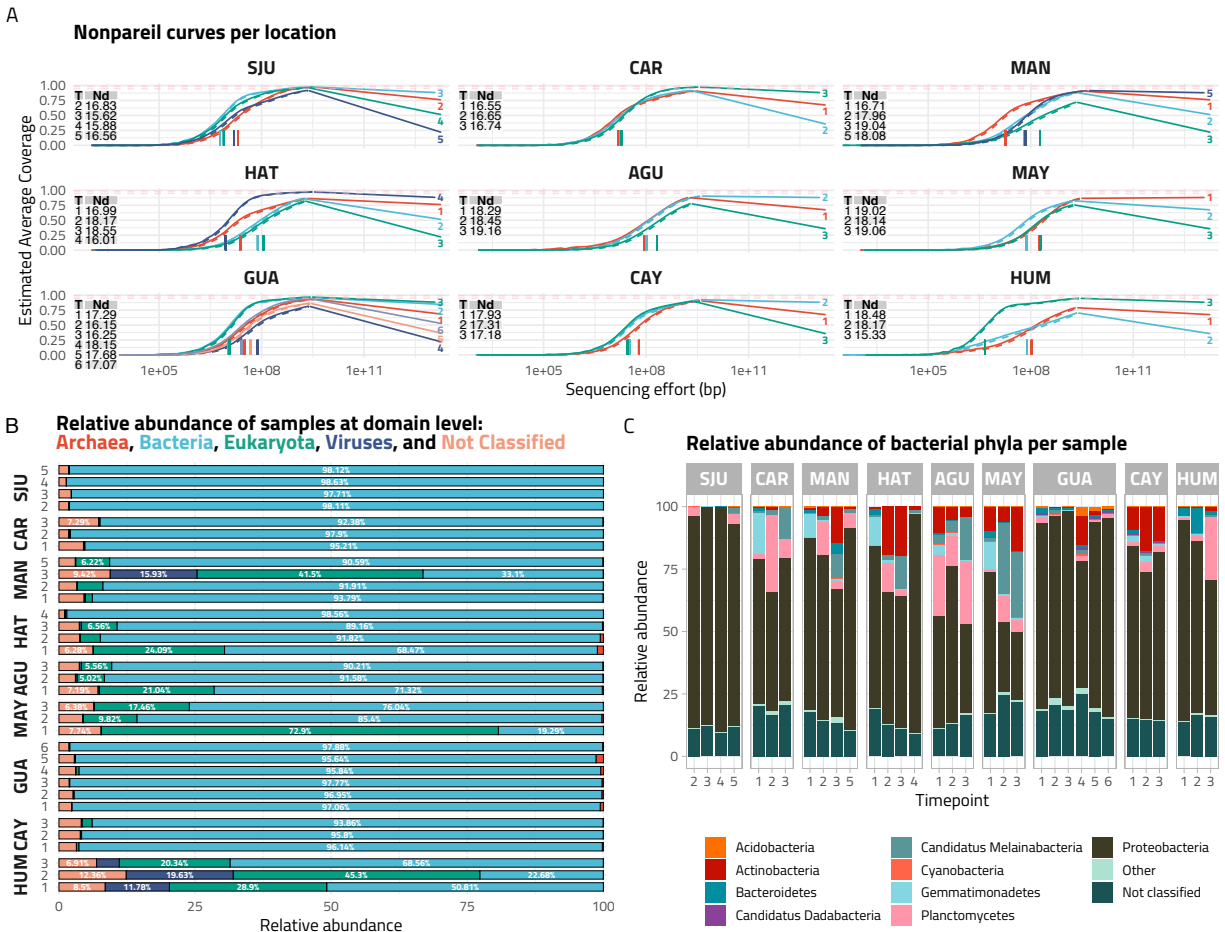

407

408 **Figure 3:** Diversity of microbial communities in metagenomes. (A) Nonpareil curves faceted by location. Each curve within facet  
 409 denotes a sample directly labelled by timepoint. Respective Nonpareil diversity (Nd) is shown in table on the top left corner of  
 410 each facet. The bars correspond to the sample estimated sequencing effort. Nd value indicates within sample community  
 411 complexity in the sequence space. (B) Domain level relative abundances (RA) calculated with sample coverage information and  
 412 CAT annotations. RAs greater than 5% are directly labelled. In some locations a large proportion of the samples were not  
 413 classified, but Bacteria makes up the largest portion of most samples. (C) Relative abundances at Phylum level. Scaffolds  
 414 classified to Bacterial domain were designated as 100%. Proteobacteria was the dominant phyla in the majority of samples.  
 415

416 The coverage of scaffolds classified as bacteria was normalized by rpoB gene coverage in the  
 417 respective samples to assess the bacterial community (Figure 3C, Table S10). The proportion of  
 418 bacterial scaffolds not classified beyond the domain level ranged from 9.20-24.80% and patterns  
 419 were consistent within location. Similar to previous studies, Proteobacteria was the dominant  
 420 phylum in the majority of samples, ranging from 27.31-90.07%, with a mean of  $64.2 \pm 16.6\%$  for  
 421 all samples. Actinobacteria and Planctomycetes were also detected in all samples. Actinobacteria  
 422 is another group that is regularly detected in tap water(Hull et al., 2017). The Actinobacterial  
 423 composition of MAN, HAT, AGU, MAY, and CAY tend to be higher relative to other locations,

424 with an average RA of  $9.10 \pm 6.95\%$  in these samples, a mean  $1.21 \pm 2.77\%$  in other samples, and a  
425 global  $5.27 \pm 6.61\%$  RA. Planctomycetes is present at a RA greater than 1% in 72.72% of  
426 samples, but is predominant in CAR and AGU, with a mean RA of  $13.41 \pm 15.08\%$  and  
427  $20.58 \pm 7.24\%$ , respectively, compared to a global average of  $6.25 \pm 8.4\%$ . On average,  
428  $81.2 \pm 9.61\%$  of sample cumulative RA was not classified up to genus level. The dominant  
429 classified genera were Bradyrhizobium, Gemmata, Gemmatimonas, Hyphomicrobium,  
430 Methylobacterium, Mycobacterium, Novosphingobium, Pseudorhodoplanes, and Sphingomonas.  
431 We further compared the metagenomic assemblies recovered from the nine PR samples to other  
432 DWS (not impacted by natural disasters, i.e., undisturbed, Table S11), to assess if there were  
433 indications of significant deviation that could be attributed to HM. There was no clear clustering  
434 of metagenomes as shown by PCoA ordination of pairwise Mash distances including the nine co-  
435 assemblies from PR and 52 co-assemblies from other DWS (Figure 4A). Furthermore, there was  
436 no statistical difference between pairwise Mash distances grouped as PR vs other DWS and other  
437 DWS vs other DWS using permutational t tests ( $p > 0.3$ , Figure 4B). This suggests that the  
438 differences in metagenomes between HM impacted and other DWSs are similar to those  
439 observed between other DWSs. Additionally, complete linkage clustering indicated that SJU,  
440 MAN, HAT, and AGU, and GUA and CAY clustered closely, both within and between each  
441 other; CAR did not cluster directly with another location and MAY and HUM were similar, but  
442 separate from the rest of the PR locations (Figure S3A). The respective Mash distances of early  
443 and late samples clustered identically as the previous analyses when leveraging coverage data  
444 and CAT classification of scaffolds to subset scaffolds pertinent to these categories (Figure S3B-  
445 C). This indicates that the metagenomes from the samples collected in PR were largely  
446 consistent with what would be expected from drinking water samples, irrespective of time of  
447 collection (i.e., December 2017 or October 2018).  
448

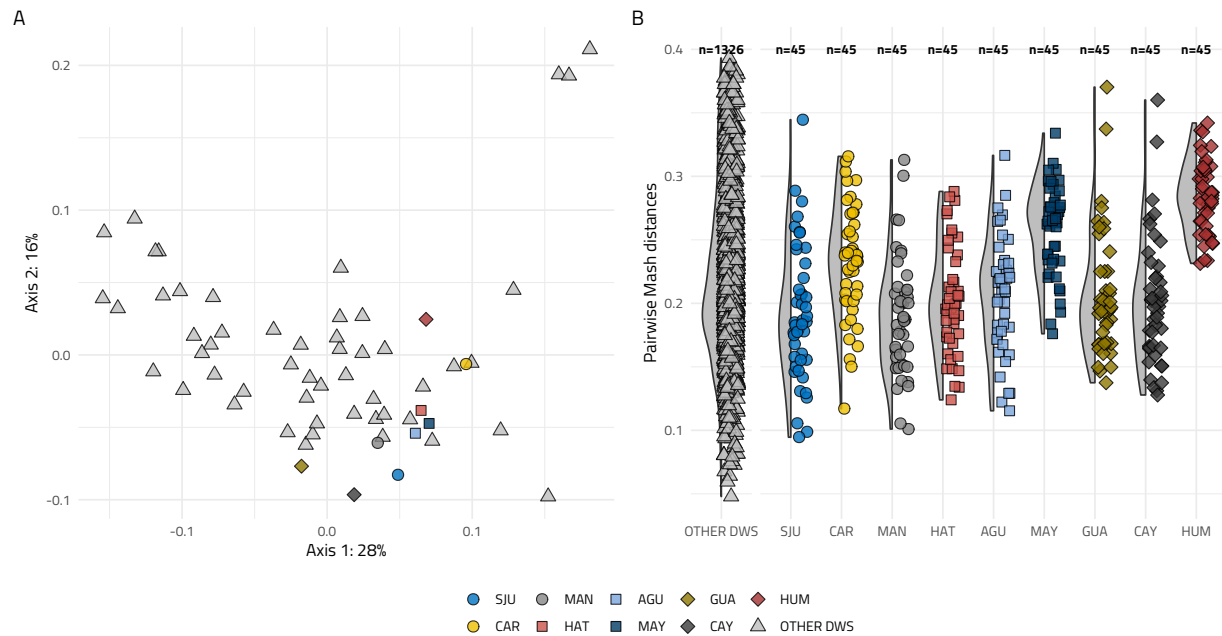

449

450 **Figure 4:** (A) PCoA ordination of Mash distances between DWS, including PR co-assemblies and reference DWSs. (B)  
451 Distribution of Mash distances prior to up sampling used for permutational t-test with group 1: other vs other and group 2: PR vs  
452 others. No significant differences were observed ( $p>0.3$ ) between groupings. Colors and shapes correspond to PR locations or  
453 reference DWS.  
454

455 **3.3 Opportunistic premise plumbing pathogens were ubiquitous and detected at low**  
456 **concentrations.** Genera that contain pathogenic species (i.e., Legionella, Leptospira,  
457 Mycobacterium, and Pseudomonas) were further investigated (Figure 5A) using CAT  
458 annotations with additional support from Kraken and/or Kaiju. While monitoring of indicator  
459 organisms and residual chlorine is part of the emergency response in the aftermath of  
460 hurricanes (Patterson and Adams, 2011), challenges with regulatory compliance were common in  
461 PR prior to HM and testing laboratories remained non-operational months after the hurricane.  
462 Further there was no systematic effort to monitor the prevalence of OPPPs (e.g., Legionella,  
463 Pseudomonas, and NTM). Heavy rain and flooding can severely impact water sources and as a  
464 result, distribution systems may increase the prevalence of pathogens in drinking water systems,  
465 leading to potential health risks.  
466

467

467 Previous studies have reported the incidence of waterborne illnesses post hurricanes, including  
468 diseases with Legionella, NTM and Leptospira as causative agents (Maness, 2019; Shukla et al.,  
469 2018; Sutter and Sosa Pascual, 2018; Walker, 2018). Of the potential OPPP genera, Legionella  
470 and Mycobacterium were detected in most locations, while Pseudomonas was consistently

471 detected in MAN, HAT, and HUM. Pathogenic *Leptospira* was only detected in GUA. There  
472 were statistically significant (Wilcoxon test,  $p < 0.05$ ) temporal differences in relative abundances  
473 of OPPPs for *Legionella* in MAN, *Mycobacterium* in HAT, MAY, GUA, and HUM, and  
474 *Pseudomonas* in HAT.

475

476 We used qPCR to quantify the abundance of *Legionella spp.* and *Mycobacterium spp.*, while also  
477 conducting more targeted assays to detect and quantify the abundance of *Legionella*  
478 *pneumophila*, *Mycobacterium avium*, and *Pseudomonas aeruginosa*, and pathogenic species of  
479 the *Leptospira* genus (Figure 5B). The average qPCR efficiencies for these assays was ~92.9%.  
480 Negative controls for each sampling campaign were included in every assay. *Mycobacterium*  
481 *avium* and *Pseudomonas aeruginosa* were not detected in any of the samples. The mean  
482 concentration for *Legionella pneumophila*, *Legionella spp.*, pathogenic *Leptospira*, and  
483 *Mycobacterium spp.* in the samples was 0.3, 7.8, 0.01, and 1 copies  $\text{mL}^{-1}$ , respectively.  
484 *Mycobacterium spp.* were observed in all locations with a general frequency of detection of 74%.  
485 *Mycobacterium spp.* were detected at every sampling timepoint in MAN, GUA, and CAY at very  
486 low concentrations ( $0.81 \pm 1.09$  copies  $\text{mL}^{-1}$ ), while their concentrations were as high as 10 copies  
487  $\text{mL}^{-1}$  at CAR and only detected in the first three timepoints. Consistent with metagenomic  
488 results, *Legionella spp.* was widely observed across all sampling locations at an 81% frequency  
489 of detection, with highest concentrations observed in SJU, CAR, and GUA. *Legionella spp.*  
490 concentrations decreased from 50 and 127 copies  $\text{mL}^{-1}$  at SJU and CAR, respectively to below 1  
491 copy  $\text{mL}^{-1}$  from December 2017 to October 2018. *Legionella spp.* thrive in warmer  
492 temperatures (Lesnik et al., 2016), such as those in PR. Interestingly, concentrations *Legionella*  
493 *spp.* and *Mycobacterium spp.* are several orders of magnitude lower than what has been published  
494 in literature (Huang et al., 2021; Isaac and Sherchan, 2020; Ley et al., 2020; Liu et al., 2019) (i.e.,  
495  $1-10^4$  copies  $\text{mL}^{-1}$ ). A potential reason for this could be over-chlorination in the systems, which  
496 had been reported in the aftermath of HM (Brown et al., 2018), including in early phase of  
497 sampling as this study showed.

498

499 The *dotA* gene assay to target *Legionella pneumophila* revealed low concentrations (i.e.,  
500  $0.29 \pm 0.44$  copies  $\text{mL}^{-1}$  for SJU and GUA locations. In SJU, *L. pneumophila* was detected in  
501 timepoints 4 and 5 only, while being detected at GUA at all timepoints. This is consistent with

502 observations from other DWS where *Legionella pneumophila* was detected at low frequency and  
 503 low concentrations(Lu et al., 2016; Wang et al., 2012).The LipL32 gene of pathogenic  
 504 *Leptospira* were observed only in GUA and at timepoints 1, 4, and 6 (i.e., 0.01 copies mL<sup>-1</sup>,  
 505 5.6% frequency). The detection of *Leptospira* at this location was consistent with the detection of  
 506 the genus *Leptospira* using metagenomics. *Leptospira* is not routinely reported in DWS, apart  
 507 from the recent study by Keenum et al.(Keenum et al., 2021), possibly due to the efficacy of  
 508 routine disinfection practices in the elimination of this pathogen(Wynwood et al., 2014).  
 509 However, its importance has been highlighted in rivers and creeks when used as drinking water  
 510 without proper treatment, particularly in situations of water scarcity, such as hurricanes(Keenum  
 511 et al., 2021; Truitt et al., 2020). The presence of *Leptospira* in GUA is possibly exacerbated by  
 512 the absence of residual chlorine at this location.  
 513

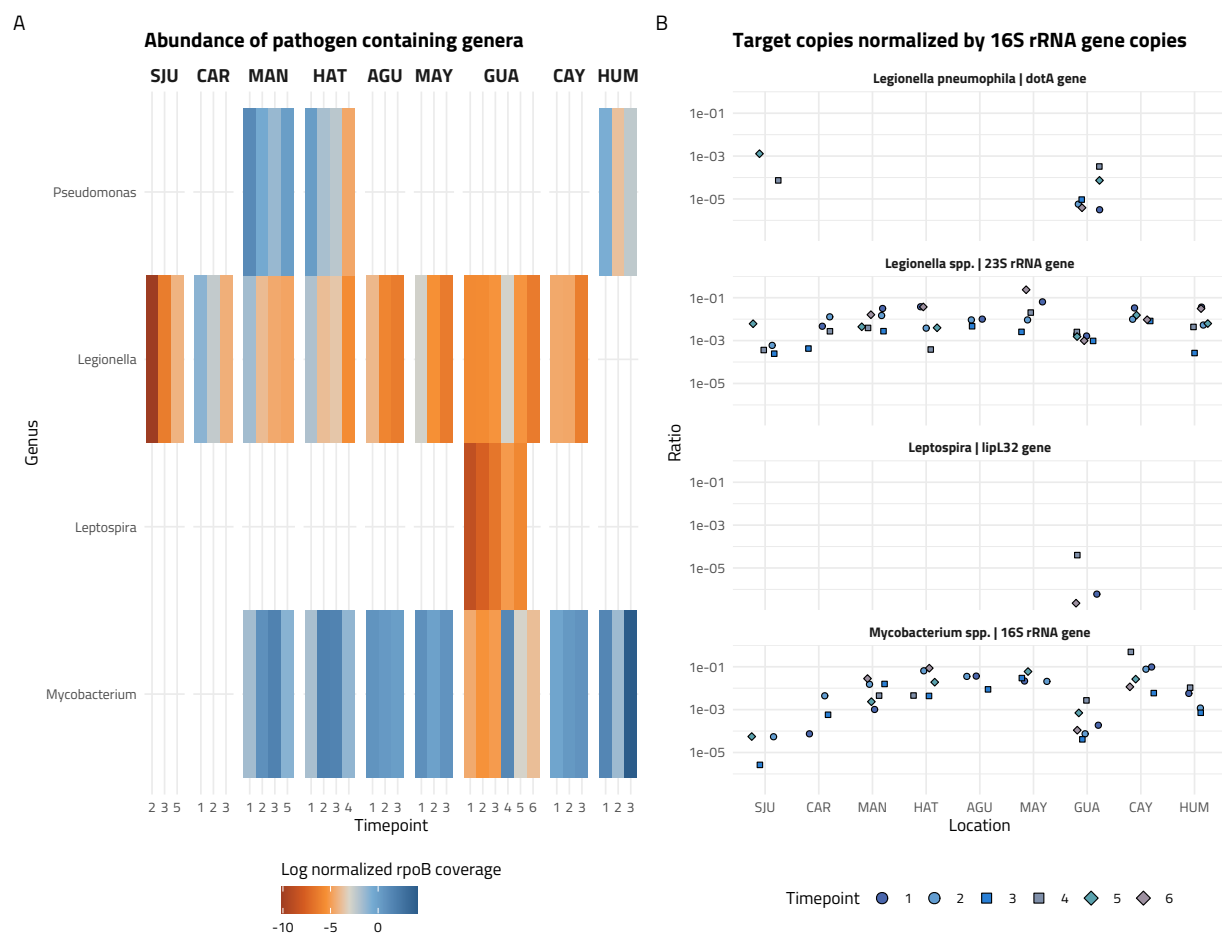

514

515 **Figure 5:** (A) rpoB normalized coverage of selected genera relevant to drinking water systems. Annotations are based on CAT  
 516 classification and support from Kaiju or/and Kraken. (B) Ratio of copy numbers of targets (i.e. *Legionella pneumophila*,

517 *Legionella spp.*, pathogenic *Leptospira*, and *Mycobacterium spp.*) to 16S rRNA gene copies. Colors and shapes correspond to  
518 timepoints. *Legionella spp.* and *Mycobacterium spp.* are ubiquitous and more abundant than other targets. *Pseudomonas*  
519 *aeruginosa* or *Mycobacterium avium* were not detected in any samples.  
520

521 **3.4 A small fraction of recovered metagenome assembled genomes were associated with**  
522 **pathogens.** Metagenomes were co-assembled by location, binned, and manually refined with  
523 anvi'o. 105 bacterial MAGs were recovered after dereplication with dRep and quality filtering  
524 for completeness greater than 50% and percent redundancy lower than 10%. We identified one  
525 or more 16S rRNA in 39% of the MAGs. Further, we compared the differences in abundances  
526 between samples by accounting for MAGs read recruitment. Of these, 37% of the MAGs were  
527 detected in a quarter or more of the samples (Figure 6, Table S12). The PR MAGs were shared  
528 homology with 4.55% of a recently published JGI MAG collection based on ANI values ranging  
529 from 74.65-99.49%. JGI MAGs ecosystem categories represent aquatic (36.75%), human  
530 (31.31%), terrestrial (6.5%), built environment (5.03%), and wastewater (5%) environments. In  
531 contrast, the ecosystem distribution of the PR MAGs pairwise comparisons with JGI MAGs was  
532 comprised of aquatic (32.49%), terrestrial (20.57%), built environment (13.64%), plants (12.5%),  
533 and lab enrichment (4.95%) habitats. The aquatic ecosystem had the largest number of same  
534 species representation (20% of PR MAGs, Figure 6) with species boundaries level set at 83%  
535 cutoff threshold(Jain et al., 2018), and included 2 JGI MAGs also recovered from DWS.

536  
537 Despite this observation, the JGI MAG dataset suffers from lack of representation of MAGs  
538 assembled from DWS habitats (n=7). Therefore, a complimentary approach was used by  
539 mapping metagenomic reads from diverse ecosystems against the MAGs assembled in this study  
540 using the SearchSRA tool. This analysis indicated that the aquatic ecosystem was found to be the  
541 top environmental association for 63.8% of our recovered MAGs, the other top ecosystems were  
542 terrestrial (21.9%), human (13.3%), and mammal (1.0%) associated environments (Figure 6).  
543 However, if we consider the top four environments, aquatic ecosystem category is represented in  
544 all of our MAGs. There were statistically significant differences (ANOVA,  $p < 0.001$ ) between  
545 the proportion of reads mapping from each ecosystem category mapping to the PR MAGs, the  
546 only pairwise comparisons that were not statistically significant were terrestrial vs aquatic  
547 (Tukey's,  $p = 0.96$ ) and mammals vs human environments (Tukey's,  $p = 0.06$ ). Additionally, more  
548 than 13% of the aquatic ecosystem metagenomes were associated with DWS. Altogether, these

549 analyses show that our MAGs are widely distributed in the environment, but are largely  
550 associated with aquatic and DWS associated environments.

551  
552 The classification of resulting representative MAGs consisted of 64.8% Proteobacteria, followed  
553 by 14.3% Cyanobacteria, 12.4% Planctomycetota, and 3.81% Actinobacteriota. All of the  
554 Actinobacteria MAGs were classified as Mycobacterium. More than 50% of the MAGs were not  
555 classified to genus level. The most abundant genera among the MAGs included  
556 Hyphomicrobium (n=6), Bradyrhizobium (n=4), Gemmata (n=4), Mycobacterium (n=4), and  
557 Porphyrobacter (n=4). There was no relationship between environmental parameters and MAG  
558 abundance as assessed by Mantel statistic ( $r = 0.133$ ,  $p > 0.05$ ) or constrained redundancy  
559 analyses. Three of the four Mycobacterium MAGs were classified up to species level and  
560 correspond to *Mycobacterium gordonae*, *Mycobacterium paragordonae*, and *Mycobacterium*  
561 *phocaicum*, all of which have been recovered from drinking water systems previously and are  
562 associated with infections in immunocompromised individuals (Shachor-Meyouhas et al., 2014).  
563 *M. gordonae* was more abundant (RPKM=2.27±2.77) and frequently detected (58%) than *M.*  
564 *paragordonae* (RPKM=0.77±0.41, 42% detection). Nevertheless, their abundance and frequency  
565 of detection was higher than for *M. phocaicum* (RPKM=1.8±1.9, 15% detection).  
566 Mycobacterium MAGs were not detected from SJU, and infrequently detected at CAR, GUA,  
567 and HUM. A single Pseudomonas MAG was recovered and classified as *Pseudomonas*  
568 *alcaligenes*. This MAG was only detected once and at the first timepoint at CAR, HAT, AGU,  
569 and MAY. At the MAN location, it was detected in the initial and final timepoint and at higher  
570 abundance at the final timepoint. *Pseudomonas alcaligenes* carries multiple antibiotic resistance  
571 genes, are considered opportunistic human pathogens and have been identified in previous  
572 literature characterizing drinking water systems, particularly in chlorinated systems (Jia et al.,  
573 2019; Ma et al., 2019).

574

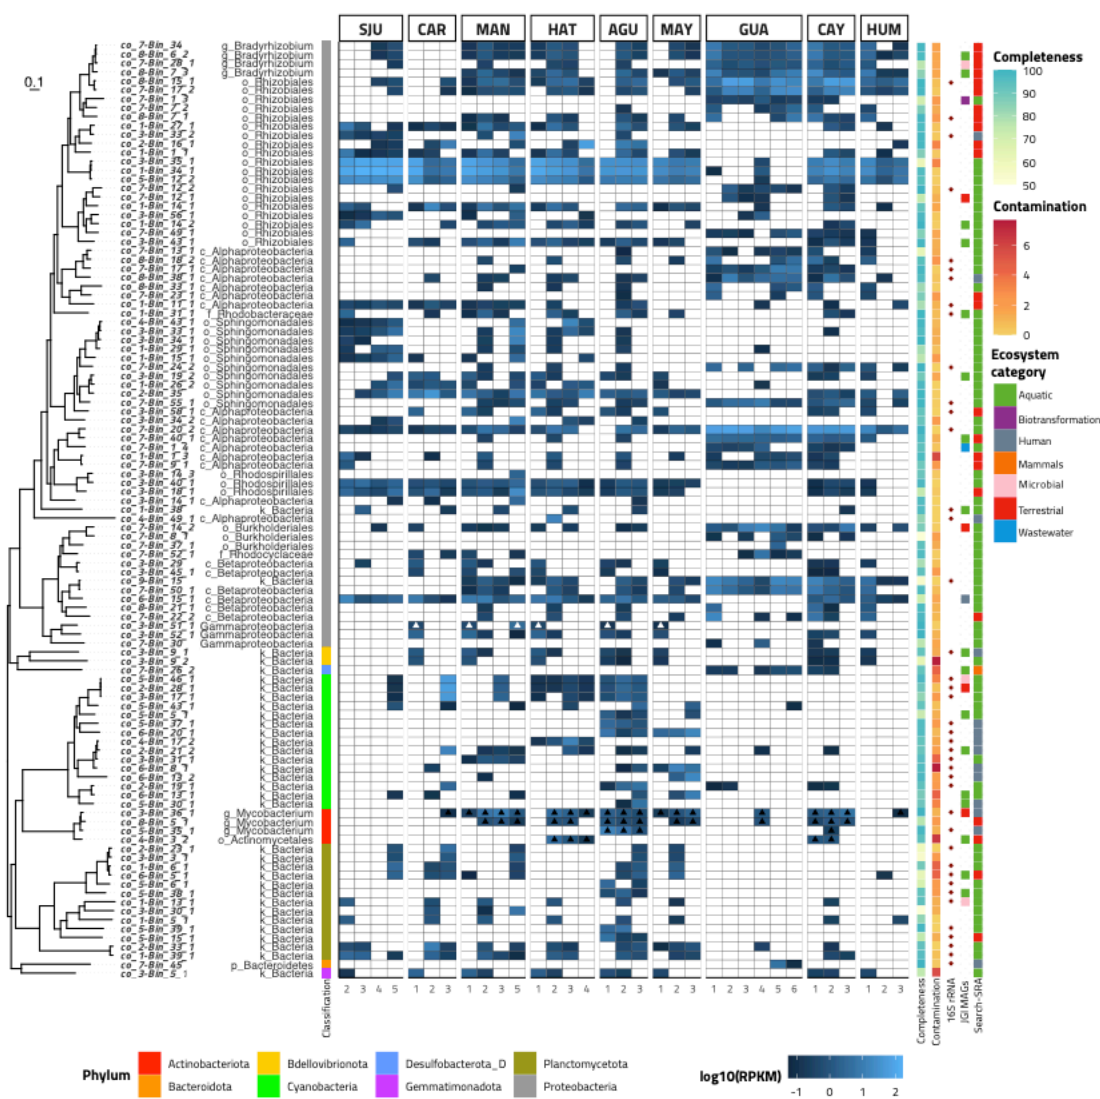

575  
 576 **Figure 6:** Metagenomic assembled genomes (MAG) information. From left to right: Phylogenomic tree of 105 recovered MAGs.  
 577 Each branch is labelled by MAG code (italics) and marker lineage of MAG classified by GTDB-tk and annotated by color of  
 578 phylum. Heatmap rows correspond to respective MAG and color gradient denotes  $\log_{10}(\text{RPKM})$  values of MAGs detected in  
 579 samples. A MAG was considered detected if  $\geq 25\%$  of its bases were covered by at least one read from the corresponding  
 580 sample. Presence of color denotes detection of MAG and the blue gradient becomes lighter as abundance (i.e., RPKM)  
 581 increases. Triangles in the heatmap highlight *Pseudomonas* spp. (white) and *Mycobacterium* spp. (black). MAG completeness  
 582 ranges from 50-100% with color gradient from pale green to blue increasing value and contamination ranges from 0-10% with  
 583 intense red corresponding to higher values. Red diamonds correspond to MAGs with one or more 16S rRNA gene detected. The  
 584 highest ANI value between JGI MAGs and corresponding MAG from this study is colored according to ecosystem categories  
 585 from JGI MAGs, if blank, no ANI above 83% was observed for that particular MAG. SearchSRA top environmental niche is  
 586 depicted using the same color legend.  
 587

#### 588 4. Conclusions

589 This study characterized the microbial communities of nine locations in the aftermath of severe  
 590 hurricanes (i.e., Irma and Maria) in a spatial-temporal yearlong survey using targeted and non-  
 591 targeted molecular methods. Our results highlight that maintaining a disinfectant residual helps



592 manage microbial concentration at the taps, yet sampling locations showed significant variation  
593 in the earlier timepoints. The estimated bacterial concentrations based on 16S rRNA gene  
594 abundance at the sampling locations were consistent with literature established values  
595 characterizing DWSs and generally decreased over time. Additionally, members of the microbial  
596 community were comparable to those found in other DWSs which were not impacted by natural  
597 disasters. Regardless of the ubiquity of some targeted OPPPs, such as *Legionella spp.* and  
598 *Mycobacterium spp.*, they were present at low concentrations. Interestingly, pathogenic  
599 *Leptospira* was only detected at a single location and its presence could be associated with a lack  
600 of disinfectant residual at that site. A small fraction of metagenome assembled genomes were  
601 associated with potential pathogens, and other recovered MAGs represent previously reported  
602 taxa routinely found in drinking water systems. Altogether, the water disruptions (i.e., no water  
603 or intermittent supply) that were sustained after HM did not have a significant impact on the  
604 microbiological quality of drinking water in our study sites.

605

#### 606 **Data availability**

607 Metagenomic data is available on NCBI at Bioproject number: PRJNA718649 and the co-  
608 assemblies and metagenome assembled genomes are available on figshare at:  
609 <https://doi.org/10.6084/m9.figshare.c.5414964>.

610

#### 611 **Acknowledgements**

612 This study is supported by the United States National Science Foundation (NSF, CBET-  
613 1829754, CBET-1832756, IIS-1546428), the National Institute of Environmental Health  
614 Sciences (NIEHS) grants P42ES017198 and P50ES026049, and U.S. Environmental Protection  
615 Agency (EPA) grant R83615501. The authors acknowledge and extend their sincerest gratitude  
616 towards Lilliana Gonzalez, Jesus Lee-Borges, Perla Torres, Vibha Bansal, and Ezio Fasoli for  
617 their collaboration in sampling logistics.

618

#### 619 **References (MLA)**

- 620 Allaire, M., Wu, H., Lall, U., 2018. National trends in drinking water quality violations 115, 1–6.  
621 <https://doi.org/10.1073/pnas.1719805115>
- 622 Alneberg, J., Bjarnason, B.S., Bruijn, I. De, Schirmer, M., Quick, J., Ijaz, U.Z., Lahti, L., Loman, N.J., Andersson,  
623 A.F., Quince, C., 2014. Binning metagenomic contigs by coverage and composition 11.

- 624 <https://doi.org/10.1038/nmeth.3103>
- 625 Anuj, S.N., Whiley, D.M., Kidd, T.J., Bell, S.C., Wainwright, C.E., Nissen, M.D., Sloots, T.P., 2009. Identification  
626 of *Pseudomonas aeruginosa* by a duplex real-time polymerase chain reaction assay targeting the *ecfX* and the  
627 *gyrB* genes. *Diagn. Microbiol. Infect. Dis.* 63, 127–131. <https://doi.org/10.1016/j.diagmicrobio.2008.09.018>
- 628 ASCE, 2017. Infrastructure Report Card: A comprehensive assesment of America’s infrastructure.
- 629 Ashbolt, N.J., 2015. Microbial Contamination of Drinking Water and Human Health from Community Water  
630 Systems 95–106. <https://doi.org/10.1007/s40572-014-0037-5>
- 631 Bautista-de los Santos, Q.M., Chavarria, K.A., Nelson, K.L., 2019. Understanding the impacts of intermittent supply  
632 on the drinking water microbiome. *Curr. Opin. Biotechnol.* 57, 167–174.  
633 <https://doi.org/10.1016/j.copbio.2019.04.003>
- 634 Brown, P., Ve, C.M., Murphy, C.B., Welton, M., Torres, H., Rosario, Z., Alshawabkeh, A., Cordero, F., Padilla,  
635 I.Y., Meeker, J.D., 2018. Hurricanes and the Environmental Justice Island : Irma and Maria in Puerto Rico 11,  
636 148–153. <https://doi.org/10.1089/env.2018.0003>
- 637 Buchfink, B., Xie, C., Huson, D.H., 2014. Fast and sensitive protein alignment using DIAMOND. *Nat. Methods* 12,  
638 59–60. <https://doi.org/10.1038/nmeth.3176>
- 639 Bushnell, B., 2015. BBMap [WWW Document]. <https://sourceforge.net/projects/bbmap/>.
- 640 Caporaso, J.G., Lauber, C.L., Walters, W.A., Berg-Lyons, D., Lozupone, C.A., Turnbaugh, P.J., Fierer, N., Knight,  
641 R., 2011. Global patterns of 16S rRNA diversity at a depth of millions of sequences per sample. *Proc. Natl.*  
642 *Acad. Sci. U. S. A.* 108, 4516–4522. <https://doi.org/10.1073/pnas.1000080107>
- 643 Chen, S., Zhou, Y., Chen, Y., Gu, J., 2018. Fastp: An ultra-fast all-in-one FASTQ preprocessor. *Bioinformatics* 34,  
644 i884–i890. <https://doi.org/10.1093/bioinformatics/bty560>
- 645 Chern, E.C., King, D., Haugland, R., Pfaller, S., 2015. Evaluation of quantitative polymerase chain reaction assays  
646 targeting *Mycobacterium avium*, *M. intracellulare*, and *M. avium* subspecies *paratuberculosis* in drinking  
647 water biofilms. *J. Water Health* 13, 131–139. <https://doi.org/10.2166/wh.2014.060>
- 648 Collier, S.A., Deng, L., Adam, E.A., Benedict, K.M., Beshearse, E.M., Blackstock, A.J., Bruce, B.B., Derado, G.,  
649 Edens, C., Fullerton, K.E., Gargano, J.W., Geissler, A.L., Hall, A.J., Havelaar, A.H., Hill, V.R., Hoekstra,  
650 R.M., Reddy, S.C., Scallan, E., Stokes, E.K., Yoder, J.S., Beach, M.J., 2021. Estimate of burden and direct  
651 healthcare cost of infectious waterborne disease in the United States. *Emerg. Infect. Dis.* 27, 140–149.  
652 <https://doi.org/10.3201/eid2701.190676>
- 653 Dai, Z., Sevillano-Rivera, M., Calus, S., Bautista-de los Santos, Q.M., Eren, A.M., van der Wielen, P.W.J.J., Ijaz,  
654 U.Z., Pinto, A., 2020. Disinfection exhibits systematic impacts on the drinking water microbiome.  
655 *Microbiome*.
- 656 Douterelo, I., Calero-Preciado, C., Soria-Carrasco, V., Boxall, J.B., 2018. Whole metagenome sequencing of  
657 chlorinated drinking water distribution systems. *Environ. Sci. Water Res. Technol.* 4, 2080–2091.  
658 <https://doi.org/10.1039/c8ew00395e>
- 659 Eren, A.M., Esen, C., Quince, C., Vineis, J.H., Morrison, H.G., Sogin, M.L., Delmont, T.O., 2015. Anvi’o : an  
660 advanced analysis and visualization platform for ‘ omics data 1–29. <https://doi.org/10.7717/peerj.1319>

- 661 Estrada, F., Botzen, W.J.W., Tol, R.S.J., 2015. with an influence from climate change 8, 6–11.  
662 <https://doi.org/10.1038/NGEO2560>
- 663 Exum, N.G., Betanzo, E., Schwab, K.J., Chen, T.Y.J., Guikema, S., Harvey, D.E., Harvey, D.E., 2018. Extreme  
664 Precipitation , Public Health Emergencies , and Safe Drinking Water in the USA 305–315.
- 665 Gooddy, D.C., Lapworth, D.J., Ascott, M.J., Bennett, S.A., Heaton, T.H.E., Surridge, B.W.J., 2015. Isotopic  
666 Fingerprint for Phosphorus in Drinking Water Supplies. *Environ. Sci. Technol.* 49, 9020–9028.  
667 <https://doi.org/10.1021/acs.est.5b01137>
- 668 Goodess, C.M., 2012. How is the frequency , location and severity of extreme events likely to change up to 2060 ?  
669 *Environ. Sci. Policy* 27, S4–S14. <https://doi.org/10.1016/j.envsci.2012.04.001>
- 670 Gurevich, A., Saveliev, V., Vyahhi, N., Tesler, G., 2013. QUAST: Quality assessment tool for genome assemblies.  
671 *Bioinformatics* 29, 1072–1075. <https://doi.org/10.1093/bioinformatics/btt086>
- 672 Huang, J., Chen, S., Ma, X., Yu, P., Zuo, P., Shi, B., Wang, H., Alvarez, P.J.J., 2021. Opportunistic pathogens and  
673 their health risk in four full-scale drinking water treatment and distribution systems. *Ecol. Eng.* 160.  
674 <https://doi.org/10.1016/j.ecoleng.2020.106134>
- 675 Hull, N.M., Holinger, E.P., Ross, K.A., Robertson, C.E., Harris, J.K., Stevens, M.J., Pace, N.R., 2017. Longitudinal  
676 and Source-to-Tap New Orleans, LA, U.S.A. Drinking Water Microbiology. *Environ. Sci. Technol.* 51, 4220–  
677 4229. <https://doi.org/10.1021/acs.est.6b06064>
- 678 Hyatt, D., Chen, G.L., LoCascio, P.F., Land, M.L., Larimer, F.W., Hauser, L.J., 2010. Prodigal: Prokaryotic gene  
679 recognition and translation initiation site identification. *BMC Bioinformatics* 11. <https://doi.org/10.1186/1471-2105-11-119>
- 681 Inkinen, J., Jayaprakash, B., Siponen, S., Hokajärvi, A.M., Pursiainen, A., Ikonen, J., Ryzhikov, I., Täubel, M.,  
682 Kauppinen, A., Paananen, J., Miettinen, I.T., Torvinen, E., Kolehmainen, M., Pitkänen, T., 2019. Active  
683 eukaryotes in drinking water distribution systems of ground and surface waterworks. *Microbiome* 7, 1–17.  
684 <https://doi.org/10.1186/s40168-019-0715-5>
- 685 Isaac, T.S., Sherchan, S.P., 2020. Molecular detection of opportunistic premise plumbing pathogens in rural  
686 Louisiana’s drinking water distribution system. *Environ. Res.* 181, 108847.  
687 <https://doi.org/10.1016/j.envres.2019.108847>
- 688 Jain, C., Rodriguez-R, L.M., Phillippy, A.M., Konstantinidis, K.T., Aluru, S., 2018. High throughput ANI analysis  
689 of 90K prokaryotic genomes reveals clear species boundaries. *Nat. Commun.* 9, 1–8.  
690 <https://doi.org/10.1038/s41467-018-07641-9>
- 691 Jia, S., Wu, J., Ye, L., Zhao, F., Li, T., Zhang, X.X., 2019. Metagenomic assembly provides a deep insight into the  
692 antibiotic resistome alteration induced by drinking water chlorination and its correlations with bacterial host  
693 changes. *J. Hazard. Mater.* 379, 120841. <https://doi.org/10.1016/j.jhazmat.2019.120841>
- 694 Jiang, S.C., Han, M., Chandrasekaran, S., Fang, Y., Kellogg, C.A., 2020. Assessing the water quality impacts of two  
695 Category-5 hurricanes on St. Thomas, Virgin Islands. *Water Res.* 171, 115440.  
696 <https://doi.org/10.1016/j.watres.2019.115440>
- 697 Keenum, I., Medina, M.C., Garner, E., Pieper, K.J., Blair, M.F., Milligan, E., Pruden, A., Ramirez-Toro, G.,

- 698 Rhoads, W.J., 2021. Source-to-Tap Assessment of Microbiological Water Quality in Small Rural Drinking  
699 Water Systems in Puerto Rico Six Months After Hurricane Maria. *Environ. Sci. Technol.*  
700 <https://doi.org/10.1021/acs.est.0c08814>
- 701 Kishore, N., Marqués, D., Mahmud, A., Kiang, M. V., Rodriguez, I., Fuller, A., Ebner, P., Sorensen, C., Racy, F.,  
702 Lemery, J., Maas, L., Leaning, J., Irizarry, R.A., Balsari, S., Buckee, C.O., 2018. Mortality in Puerto Rico  
703 after Hurricane Maria. *N. Engl. J. Med.* 379, 162–170. <https://doi.org/10.1056/NEJMsa1803972>
- 704 Landsman, M.R., Rowles, L.S., Brodfuehrer, S.H., Maestre, J.P., Kinney, K.A., Kirisits, M.J., Lawler, D.F., Katz,  
705 L.E., 2019. Impacts of Hurricane Harvey on drinking water quality in two Texas cities. *Environ. Res. Lett.* 14.  
706 <https://doi.org/10.1088/1748-9326/ab56fb>
- 707 Lesnik, R., Brettar, I., Höfle, M.G., 2016. Legionella species diversity and dynamics from surface reservoir to tap  
708 water: From cold adaptation to thermophily. *ISME J.* 10, 1064–1080. <https://doi.org/10.1038/ismej.2015.199>
- 709 Levy Karin, E., Mirdita, M., Söding, J., 2020. MetaEuk-sensitive, high-throughput gene discovery, and annotation  
710 for large-scale eukaryotic metagenomics. *Microbiome* 8, 1–15. <https://doi.org/10.1186/s40168-020-00808-x>
- 711 Ley, C.J., Proctor, C.R., Singh, G., Ra, K., Noh, Y., Odumayomi, T., Salehi, M., Julien, R., Mitchell, J.,  
712 Nejadhashemi, A.P., Whelton, A.J., Aw, T.G., 2020. Drinking water microbiology in a water-efficient  
713 building: Stagnation, seasonality, and physicochemical effects on opportunistic pathogen and total bacteria  
714 proliferation. *Environ. Sci. Water Res. Technol.* 6, 2902–2913. <https://doi.org/10.1039/d0ew00334d>
- 715 Li, H., 2013. Aligning sequence reads, clone sequences and assembly contigs with BWA-MEM 00, 1–3.
- 716 Li, H., Handsaker, B., Wysoker, A., Fennell, T., Ruan, J., Homer, N., Marth, G., Abecasis, G., Durbin, R., 2009. The  
717 Sequence Alignment/Map format and SAMtools. *Bioinformatics* 25, 2078–2079.  
718 <https://doi.org/10.1093/bioinformatics/btp352>
- 719 Lin, Y., Sevillano-Rivera, M., Jiang, T., Li, G., Cotto, I., Vosloo, S., Carpenter, C.M.G., Larese-Casanova, P., Giese,  
720 R.W., Helbling, D.E., Padilla, I.Y., Rosario-Pabón, Z., Vélez Vega, C., Cordero, J.F., Alshawabkeh, A.N.,  
721 Pinto, A., Gu, A.Z., 2020. Impact of Hurricane Maria on Drinking Water Quality in Puerto Rico. *Environ. Sci.*  
722 *Technol.* 54, 9495–9509. <https://doi.org/10.1021/acs.est.0c01655>
- 723 Liu, L., Xing, X., Hu, C., Wang, H., 2019. One-year survey of opportunistic premise plumbing pathogens and free-  
724 living amoebae in the tap-water of one northern city of China. *J. Environ. Sci. (China)* 77, 20–31.  
725 <https://doi.org/10.1016/j.jes.2018.04.020>
- 726 Lu, J., Struewing, I., Vereen, E., Kirby, A.E., Levy, K., Moe, C., Ashbolt, N., 2016. Molecular Detection of  
727 Legionella spp. and their associations with Mycobacterium spp., Pseudomonas aeruginosa and amoeba hosts  
728 in a drinking water distribution system. *J. Appl. Microbiol.* 120, 509–521. <https://doi.org/10.1111/jam.12996>
- 729 Ma, L., Li, B., Zhang, T., 2019. New insights into antibiotic resistome in drinking water and management  
730 perspectives: A metagenomic based study of small-sized microbes. *Water Res.* 152, 191–201.  
731 <https://doi.org/10.1016/j.watres.2018.12.069>
- 732 Maness, L.R., 2019. The Effect of Hurricanes on Pathogenic Diseases. *J. Environ. Health* 81, 16–20.
- 733 Menzel, P., Ng, K.L., Krogh, A., 2016. Fast and sensitive taxonomic classification for metagenomics with Kaiju.  
734 *Nat. Commun.* 7, 1–9. <https://doi.org/10.1038/ncomms11257>

735 Nayfach, S., Roux, S., Seshadri, R., Udway, D., Varghese, N., Schulz, F., Wu, D., Paez-Espino, D., Chen, I.M.,  
736 Huntemann, M., Palaniappan, K., Ladau, J., Mukherjee, S., Reddy, T.B.K., Nielsen, T., Kirton, E., Faria, J.P.,  
737 Edirisinghe, J.N., Henry, C.S., Jungbluth, S.P., Chivian, D., Dehal, P., Wood-Charlson, E.M., Arkin, A.P.,  
738 Tringe, S.G., Visel, A., Abreu, H., Acinas, S.G., Allen, E., Allen, M.A., Andersen, G., Anesio, A.M.,  
739 Attwood, G., Avila-Magaña, V., Badis, Y., Bailey, J., Baker, B., Baldrian, P., Barton, H.A., Beck, D.A.C.,  
740 Becraft, E.D., Beller, H.R., Beman, J.M., Bernier-Latmani, R., Berry, T.D., Bertagnolli, A., Bertilsson, S.,  
741 Bhatnagar, J.M., Bird, J.T., Blumer-Schuetz, S.E., Bohannan, B., Borton, M.A., Brady, A., Brawley, S.H.,  
742 Brodie, J., Brown, S., Brum, J.R., Brune, A., Bryant, D.A., Buchan, A., Buckley, D.H., Buongiorno, J.,  
743 Cadillo-Quiroz, H., Caffrey, S.M., Campbell, A.N., Campbell, B., Carr, S., Carroll, J.L., Cary, S.C., Cates,  
744 A.M., Cattolico, R.A., Cavicchioli, R., Chistoserdova, L., Coleman, M.L., Constant, P., Conway, J.M., Mac  
745 Cormack, W.P., Crowe, S., Crump, B., Currie, C., Daly, R., Denev, V., Denman, S.E., Desta, A., Dionisi, H.,  
746 Dodsworth, J., Dombrowski, N., Donohue, T., Dopson, M., Driscoll, T., Dunfield, P., Dupont, C.L., Dynarski,  
747 K.A., Edgcomb, V., Edwards, E.A., Elshahed, M.S., Figueroa, I., Flood, B., Fortney, N., Fortunato, C.S.,  
748 Francis, C., Gachon, C.M.M., Garcia, S.L., Gazitua, M.C., Gentry, T., Gerwick, L., Gharechahi, J., Girguis,  
749 P., Gladden, J., Gradoville, M., Grasby, S.E., Gravuer, K., Grettenberger, C.L., Gruninger, R.J., Guo, J.,  
750 Habteselassie, M.Y., Hallam, S.J., Hatzenpichler, R., Hausmann, B., Hazen, T.C., Hedlund, B., Henny, C.,  
751 Herfort, L., Hernandez, M., Hershey, O.S., Hess, M., Hollister, E.B., Hug, L.A., Hunt, D., Jansson, J., Jarett,  
752 J., Kadnikov, V. V., Kelly, C., Kelly, R., Kelly, W., Kerfeld, C.A., Kimbrel, J., Klassen, J.L., Konstantinidis,  
753 K.T., Lee, L.L., Li, W.J., Loder, A.J., Loy, A., Lozada, M., MacGregor, B., Magnabosco, C., Maria da Silva,  
754 A., McKay, R.M., McMahon, K., McSweeney, C.S., Medina, M., Meredith, L., Mizzi, J., Mock, T., Momper,  
755 L., Moran, M.A., Morgan-Lang, C., Moser, D., Muyzer, G., Myrold, D., Nash, M., Nesbø, C.L., Neumann,  
756 A.P., Neumann, R.B., Noguera, D., Northen, T., Norton, J., Nowinski, B., Nüsslein, K., O'Malley, M.A.,  
757 Oliveira, R.S., Maia de Oliveira, V., Onstott, T., Osvatic, J., Ouyang, Y., Pachiadaki, M., Parnell, J., Partida-  
758 Martinez, L.P., Peay, K.G., Pelletier, D., Peng, X., Pester, M., Pett-Ridge, J., Peura, S., Pjevac, P., Plominsky,  
759 A.M., Poehlein, A., Pope, P.B., Ravin, N., Redmond, M.C., Reiss, R., Rich, V., Rinke, C., Rodrigues, J.L.M.,  
760 Rossmassler, K., Sackett, J., Salekdeh, G.H., Saleska, S., Scarborough, M., Schachtman, D., Schadt, C.W.,  
761 Schrenk, M., Sczyrba, A., Sengupta, A., Setubal, J.C., Shade, A., Sharp, C., Sherman, D.H., Shubenkova, O.  
762 V., Sierra-Garcia, I.N., Simister, R., Simon, H., Sjöling, S., Slonczewski, J., Correa de Souza, R.S., Spear,  
763 J.R., Stegen, J.C., Stepanauskas, R., Stewart, F., Suen, G., Sullivan, M., Sumner, D., Swan, B.K., Swingley,  
764 W., Tarn, J., Taylor, G.T., Teeling, H., Tekere, M., Teske, A., Thomas, T., Thrash, C., Tiedje, J., Ting, C.S.,  
765 Tully, B., Tyson, G., Ulloa, O., Valentine, D.L., Van Goethem, M.W., VanderGheynst, J., Verbeke, T.J.,  
766 Vollmers, J., Vuillemin, A., Waldo, N.B., Walsh, D.A., Weimer, B.C., Whitman, T., van der Wielen, P.,  
767 Wilkins, M., Williams, T.J., Woodcroft, B., Woolet, J., Wrighton, K., Ye, J., Young, E.B., Youssef, N.H., Yu,  
768 F.B., Zenskaya, T.I., Ziels, R., Woyke, T., Mouncey, N.J., Ivanova, N.N., Kyrpides, N.C., Elie-Fadrosh,  
769 E.A., 2020. A genomic catalog of Earth's microbiomes. *Nat. Biotechnol.* 39. <https://doi.org/10.1038/s41587-020-0718-6>  
770  
771 Nazarian, E.J., Bopp, D.J., Saylor, A., Limberger, R.J., Musser, K.A., 2008. Design and implementation of a

- 772 protocol for the detection of *Legionella* in clinical and environmental samples. *Diagn. Microbiol. Infect. Dis.*  
773 62, 125–132. <https://doi.org/10.1016/j.diagmicrobio.2008.05.004>
- 774 NOAA NCEI, 2020. Billion-Dollar Weather and Climate Disasters [WWW Document].  
775 <https://doi.org/10.25921/stkw-7w73>
- 776 NRDC, 2017. Threats on Tap: Drinking Water Violations in Puerto Rico.
- 777 Nurk, S., Meleshko, D., Korobeynikov, A., Pevzner, P.A., 2017. MetaSPAdes: A new versatile metagenomic  
778 assembler. *Genome Res.* 27, 824–834. <https://doi.org/10.1101/gr.213959.116>
- 779 Oksanen, J., Blanchet, F.G., Kindt, R., Legendre, P., Minchin, P.R., O’Hara, R.B., Simpson, G.L., Solymos, P.,  
780 Stevens, M.H.H., Wagner, H., 2015. OK-Package ‘vegan.’ *Community Ecol. Packag. version.*
- 781 Olm, M.R., Brown, C.T., Brooks, B., Banfield, J.F., 2017. dRep : a tool for fast and accurate genomic comparisons  
782 that enables improved genome recovery from metagenomes through de-replication 11, 2864–2868.  
783 <https://doi.org/10.1038/ismej.2017.126>
- 784 Olsen, L.R., 2021. groupdata2: Creating Groups from Data.
- 785 Ondov, B.D., Treangen, T.J., Melsted, P., Mallonee, A.B., Bergman, N.H., Koren, S., Phillippy, A.M., 2016. Mash:  
786 Fast genome and metagenome distance estimation using MinHash. *Genome Biol.* 17, 1–14.  
787 <https://doi.org/10.1186/s13059-016-0997-x>
- 788 Paradis, E., Claude, J., Strimmer, K., 2004. APE: Analyses of phylogenetics and evolution in R language.  
789 *Bioinformatics* 20, 289–290. <https://doi.org/10.1093/bioinformatics/btg412>
- 790 Parks, D.H., Chuvochina, M., Waite, D.W., Rinke, C., Skarszewski, A., Chaumeil, P.A., Hugenholtz, P., 2018. A  
791 standardized bacterial taxonomy based on genome phylogeny substantially revises the tree of life. *Nat.*  
792 *Biotechnol.* 36, 996. <https://doi.org/10.1038/nbt.4229>
- 793 Patterson, C.L., Adams, J.Q., 2011. Emergency response planning to reduce the impact of contaminated drinking  
794 water during natural disasters 5, 341–349. <https://doi.org/10.1007/s11707-011-0196-8>
- 795 Quinlan, A.R., Hall, I.M., 2010. BEDTools: A flexible suite of utilities for comparing genomic features.  
796 *Bioinformatics* 26, 841–842. <https://doi.org/10.1093/bioinformatics/btq033>
- 797 R Development Core Team, 2016. R: A language and environment for statistical computing. *R Found. Stat. Comput.*  
798 <https://doi.org/10.1017/CBO9781107415324.004>
- 799 Radomski, N., Lucas, F.S., Moilleron, R., Cambau, E., Haenn, S., Moulin, L., 2010. Development of a real-time  
800 qPCR method for detection and enumeration of *Mycobacterium* spp. in surface water. *Appl. Environ.*  
801 *Microbiol.* 76, 7348–7351. <https://doi.org/10.1128/AEM.00942-10>
- 802 Rice, P., Longden, L., Bleasby, A., 2000. EMBOSS: The European Molecular Biology Open Software Suite. *Trends*  
803 *Genet.* 16, 276–277. [https://doi.org/10.1016/S0168-9525\(00\)02024-2](https://doi.org/10.1016/S0168-9525(00)02024-2)
- 804 Rodriguez-R, L.M., Gunturu, S., Tiedje, J.M., Cole, J.R., Konstantinidis, K.T., 2018. Nonpareil 3: Fast Estimation  
805 of Metagenomic Coverage and Sequence Diversity. *mSystems* 3, 1–9.  
806 <https://doi.org/10.1128/msystems.00039-18>
- 807 Sanders, E.J., Rigau-Pérez, J.G., Smits, H.L., Deseda, C.C., Vorndam, V.A., Aye, T., Spiegel, R.A., Weyant, R.S.,  
808 Bragg, S.L., 1999. Increase of leptospirosis in dengue-negative patients after a Hurricane in Puerto Rico in

- 809 1966. *Am. J. Trop. Med. Hyg.* 61, 399–404. <https://doi.org/10.4269/ajtmh.1999.61.399>
- 810 Schwab, K.J., Gibson, K.E., Williams, D.L., Kulbicki, K.M., Lo, C.P., Mihalic, J.N., Breysse, P.N., Curriero, F.C.,  
811 Geyh, A.S., 2007. Microbial and chemical assessment of regions within New Orleans, LA impacted by  
812 Hurricane Katrina. *Environ. Sci. Technol.* 41, 2401–2406. <https://doi.org/10.1021/es062916x>
- 813 Shachor-Meyouhas, Y., Geffen, Y., Arad-Cohen, N., Zaidman, I., Ben-Barak, A., Davidson, S., Kassis, I., 2014.  
814 *Mycobacterium phocaicum* bacteremia: An emerging infection in pediatric hematology-oncology patients.  
815 *Pediatr. Infect. Dis. J.* 33, 1299–1301. <https://doi.org/10.1097/INF.0000000000000477>
- 816 Shaffer, M., Borton, M.A., McGivern, B.B., Zayed, A.A., La Rosa, S.L., Solden, L.M., Liu, P., Narrowe, A.B.,  
817 Rodríguez-Ramos, J., Bolduc, B., Gazitúa, M.C., Daly, R.A., Smith, G.J., Vik, D.R., Pope, P.B., Sullivan,  
818 M.B., Roux, S., Wrighton, K.C., 2020. DRAM for distilling microbial metabolism to automate the curation of  
819 microbiome function. *Nucleic Acids Res.* 48, 8883–8900. <https://doi.org/10.1093/nar/gkaa621>
- 820 Shukla, M.A., Woc-Colburn, L., Weatherhead, J.E., 2018. Infectious Diseases in the Aftermath of Hurricanes in the  
821 United States. *Curr. Trop. Med. Reports* 5, 217–223. <https://doi.org/10.1007/s40475-018-0162-6>
- 822 Stanish, L.F., Hull, N.M., Robertson, C.E., Kirk Harris, J., Stevens, M.J., Spear, J.R., Pace, N.R., 2016. Factors  
823 influencing bacterial diversity and community composition in municipal drinking waters in the Ohio River  
824 basin, USA. *PLoS One* 11, 1–21. <https://doi.org/10.1371/journal.pone.0157966>
- 825 Stewart, C.A., Hancock, D., Stanzione, D., Turner, G., Cockerill, T.M., Merchant, N., Taylor, J., Vaughn, M.,  
826 Foster, I., Skidmore, E., Tuecke, S., Gaffney, N.I., 2015. Jetstream: A self-provisioned, scalable science and  
827 engineering cloud environment. *ACM Int. Conf. Proceeding Ser.* 2015-July.  
828 <https://doi.org/10.1145/2792745.2792774>
- 829 Stoddard, R.A., Gee, J.E., Wilkins, P.P., McCaustland, K., Hoffmaster, A.R., 2009. Detection of pathogenic  
830 *Leptospira* spp. through TaqMan polymerase chain reaction targeting the LipL32 gene. *Diagn. Microbiol.*  
831 *Infect. Dis.* 64, 247–255. <https://doi.org/10.1016/j.diagmicrobio.2009.03.014>
- 832 Sutter, J.D., Sosa Pascual, O., 2018. Deaths from bacterial disease in Puerto Rico spiked after Maria.  
833 Torres, P.J., Edwards, R.A., McNair, K.A., 2017. PARTIE: A partition engine to separate metagenomic and  
834 amplicon projects in the Sequence Read Archive. *Bioinformatics* 33, 2389–2391.  
835 <https://doi.org/10.1093/bioinformatics/btx184>
- 836 Towns, J., Cockerill, T., Dahan, M., Foster, I., Gaither, K., Grimshaw, A., Hazlewood, V., Lathrop, S., Lifka, D.,  
837 Peterson, G.D., Roskies, R., Scott, J.R., Wilkins-Diehr, N., 2014. XSEDE: Accelerating Scientific Discovery.  
838 *Comput. Sci. Eng.* 120, 62–74.
- 839 Truitt, Z.G., Poon-Kwong, B., Bachoon, D.S., Otero, E., 2020. Seasonal shifts in the presence of pathogenic  
840 leptospire, *Escherichia coli*, and physicochemical properties in coastal rivers and streams of Puerto Rico. *J.*  
841 *Environ. Qual.* 49, 1264–1272. <https://doi.org/10.1002/jeq2.20091>
- 842 Von Meijenfeldt, F.A.B., Arkhipova, K., Cambuy, D.D., Coutinho, F.H., Dutilh, B.E., 2019. Robust taxonomic  
843 classification of uncharted microbial sequences and bins with CAT and BAT. *Genome Biol.* 20, 1–14.  
844 <https://doi.org/10.1186/s13059-019-1817-x>
- 845 Vosloo, S., Sevillano-Rivera, M., Pinto, A.J., 2019. Modified DNeasy PowerWater Kit® protocol for DNA

- 846 extractions from drinking water samples. <https://doi.org/10.17504/protocols.io.66khhew>
- 847 Walker, J.T., 2018. The influence of climate change on waterborne disease and Legionella: a review. *Perspect.*
- 848 *Public Health* 138, 282–286. <https://doi.org/10.1177/1757913918791198>
- 849 Wang, H., Edwards, M., Falkinham, J.O., Pruden, A., 2012. Molecular survey of the occurrence of legionella spp.,
- 850 mycobacterium spp., pseudomonas aeruginosa, and amoeba hosts in two chloraminated drinking water
- 851 distribution systems. *Appl. Environ. Microbiol.* 78, 6285–6294. <https://doi.org/10.1128/AEM.01492-12>
- 852 Warren, M.R., 2019. Challenges with sampling and understanding lead corrosion issues in Puerto Rico after
- 853 hurricane Maria. University of Colorado.
- 854 Wickham, H., 2011. Ggplot2. *Wiley Interdiscip. Rev. Comput. Stat.* 3, 180–185. <https://doi.org/10.1002/wics.147>
- 855 Wickham, H., Girlich, M., Ruiz, E., 2021. dbplyr: A “dplyr” Back End for Databases.
- 856 Wood, D.E., Lu, J., Langmead, B., 2019. Improved metagenomic analysis with Kraken 2. *Genome Biol.* 20, 1–13.
- 857 <https://doi.org/10.1186/s13059-019-1891-0>
- 858 Wynwood, S.J., Graham, G.C., Weier, S.L., Collet, T.A., McKay, D.B., Craig, S.B., 2014. Leptospirosis from water
- 859 sources. *Pathog. Glob. Health* 108, 334–338. <https://doi.org/10.1179/2047773214Y.0000000156>
- 860 Yáñez, M.A., Carrasco-Serrano, C., Barberá, V.M., Catalán, V., 2005. Quantitative detection of Legionella
- 861 pneumophila in water samples by immunomagnetic purification and real-time PCR amplification of the dotA
- 862 gene. *Appl. Environ. Microbiol.* 71, 3433–3441. <https://doi.org/10.1128/AEM.71.7.3433-3441.2005>
- 863
- 864



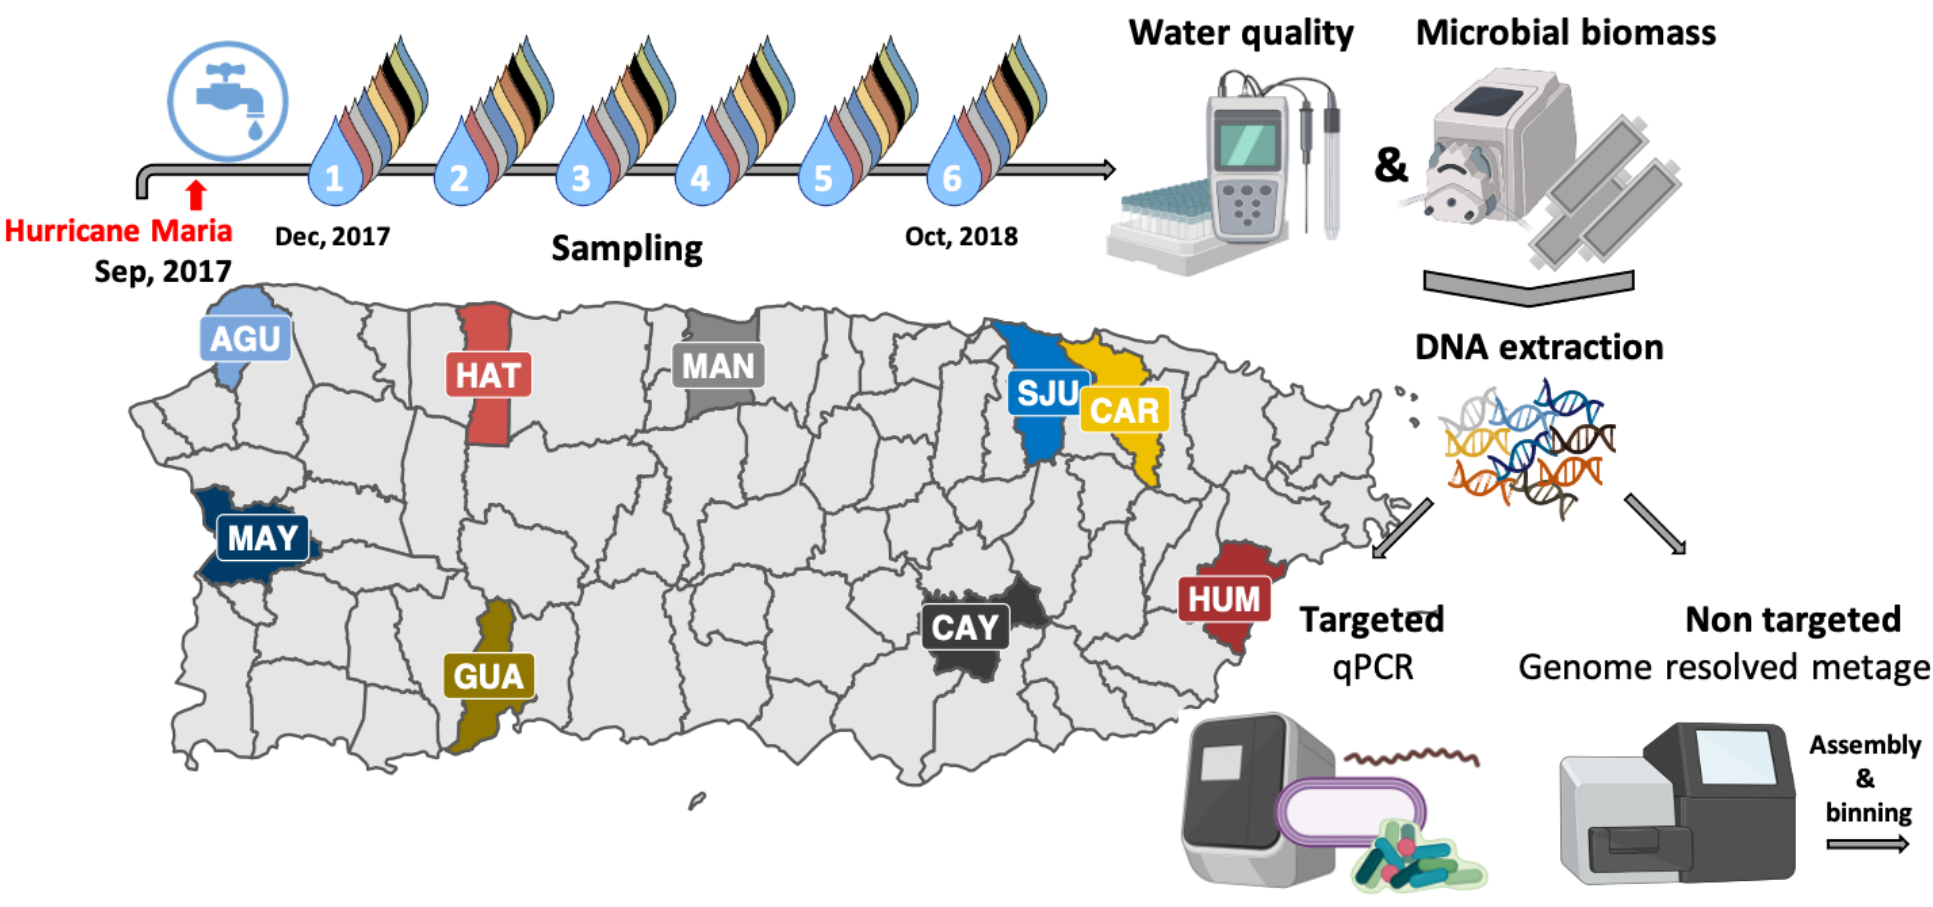

A

## Water quality parameters

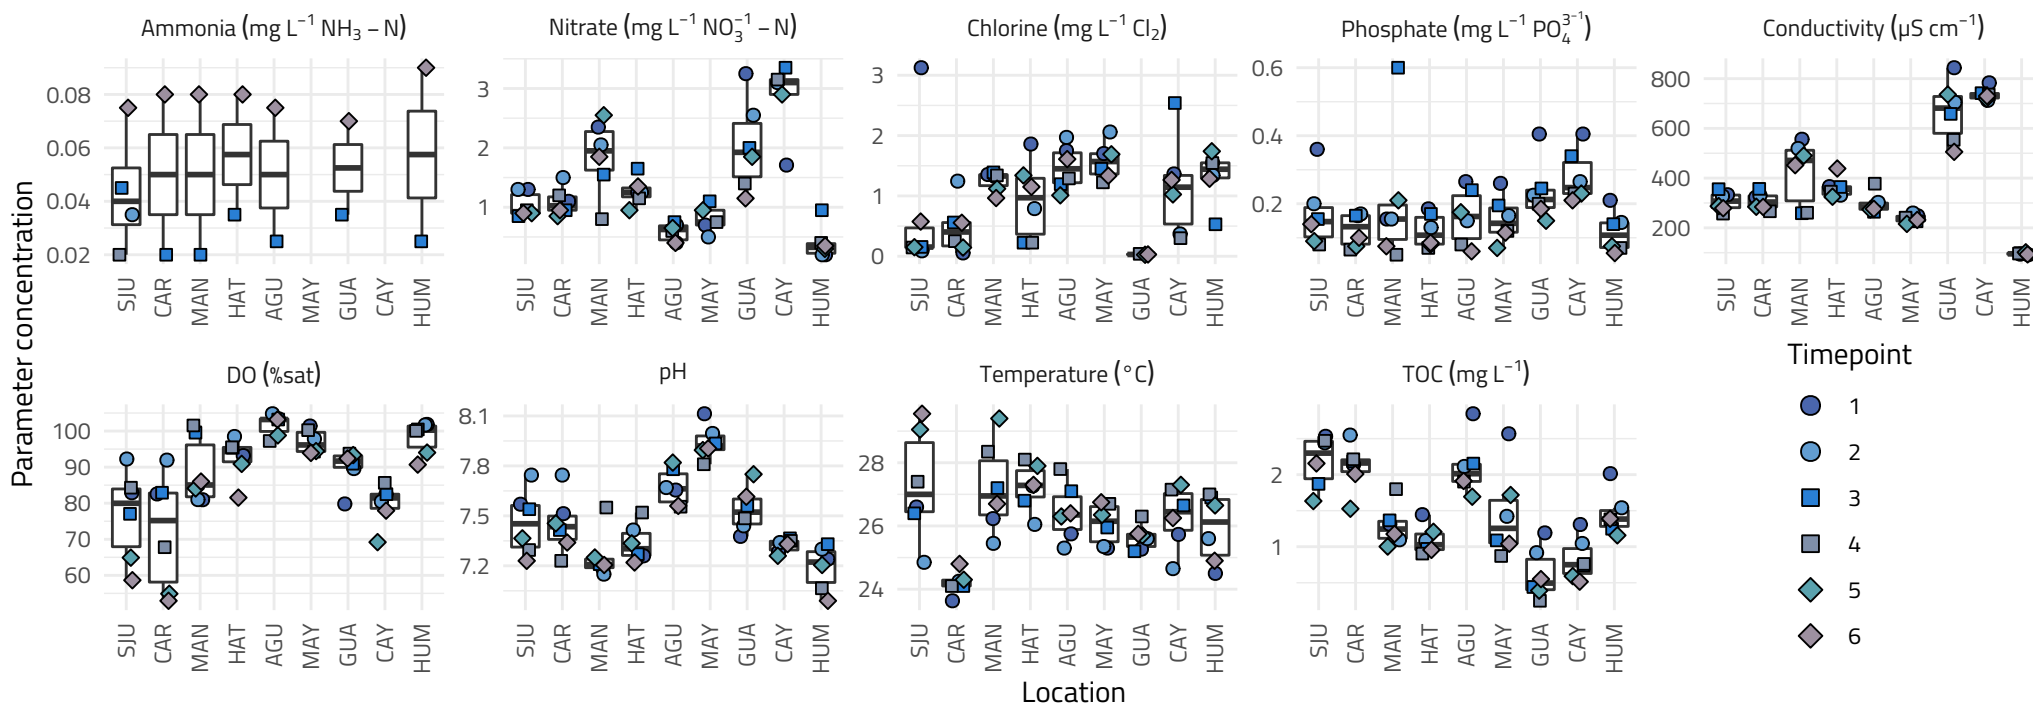

B

## PCA of water quality parameters

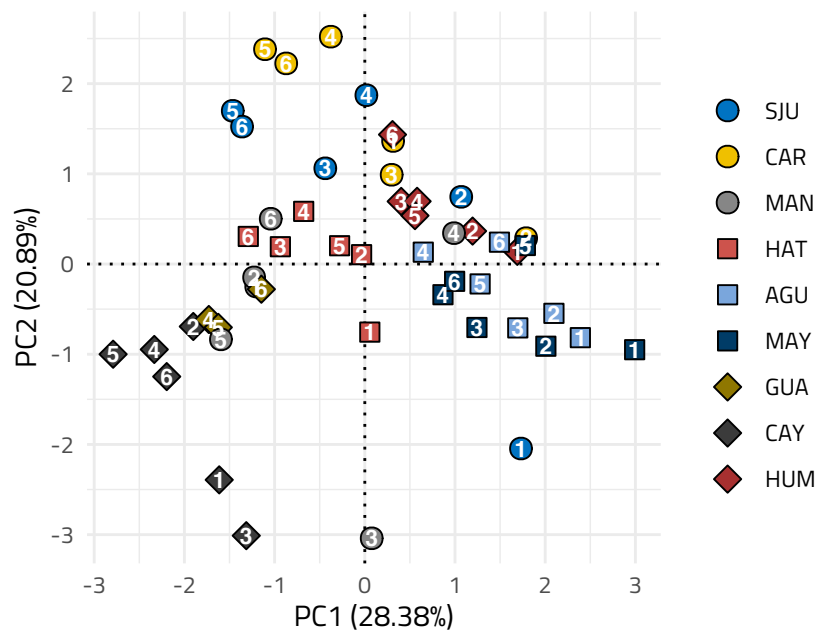

C

## 16S rRNA gene copies in samples and blanks across time points

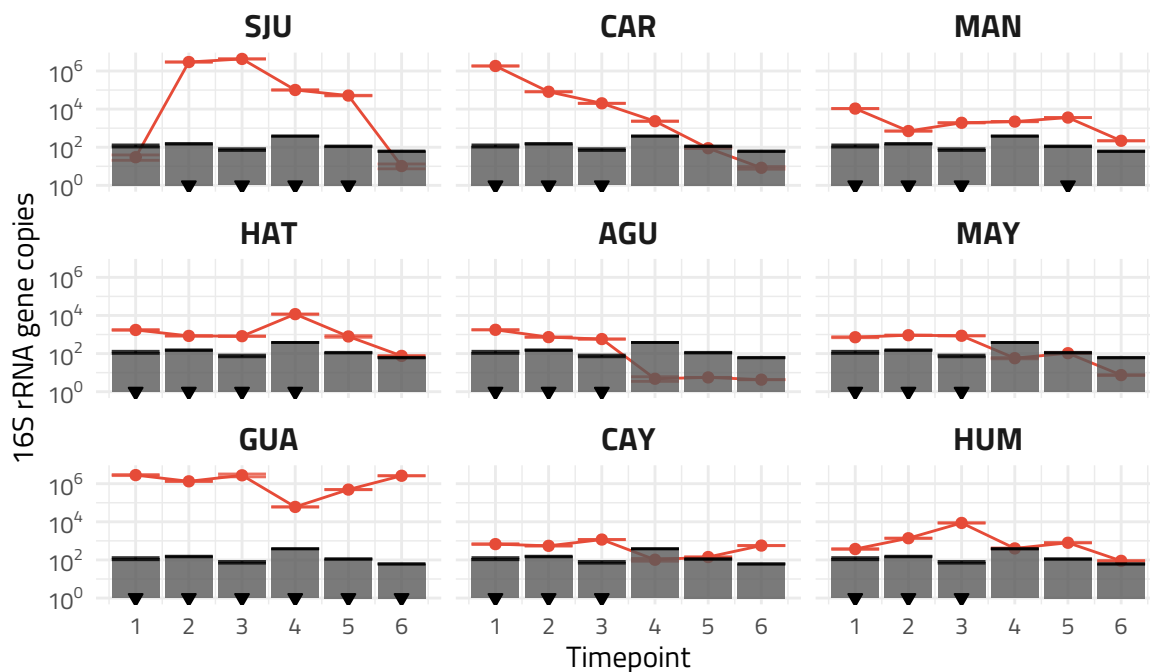

# Correlation between volume normalized 16S rRNA gene copies and chlorine concentration (mg/L)

A

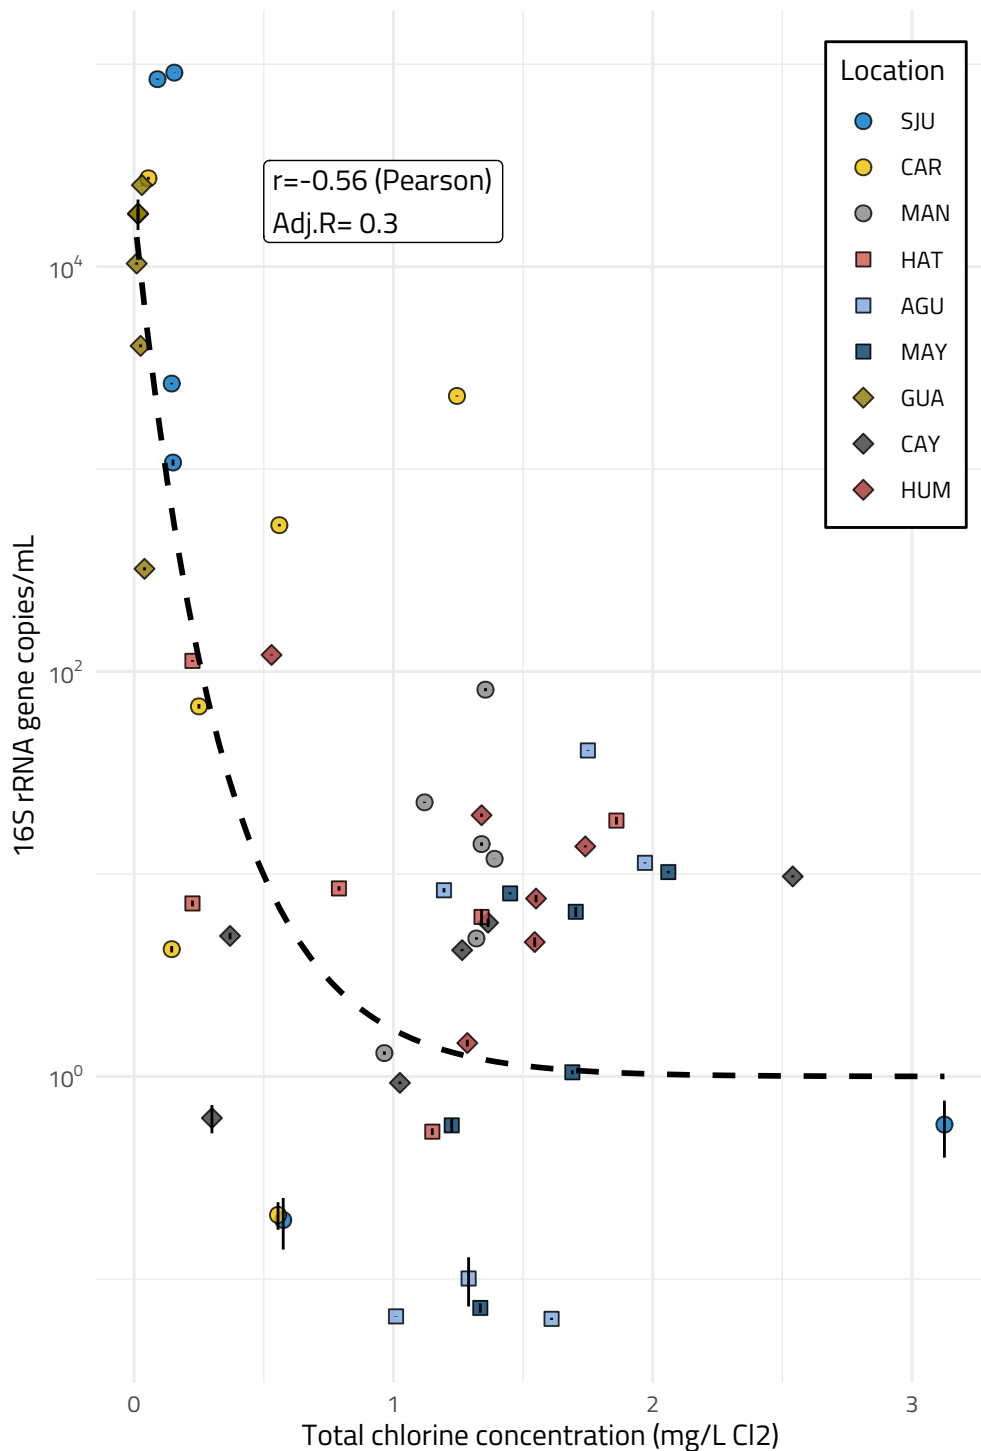

B

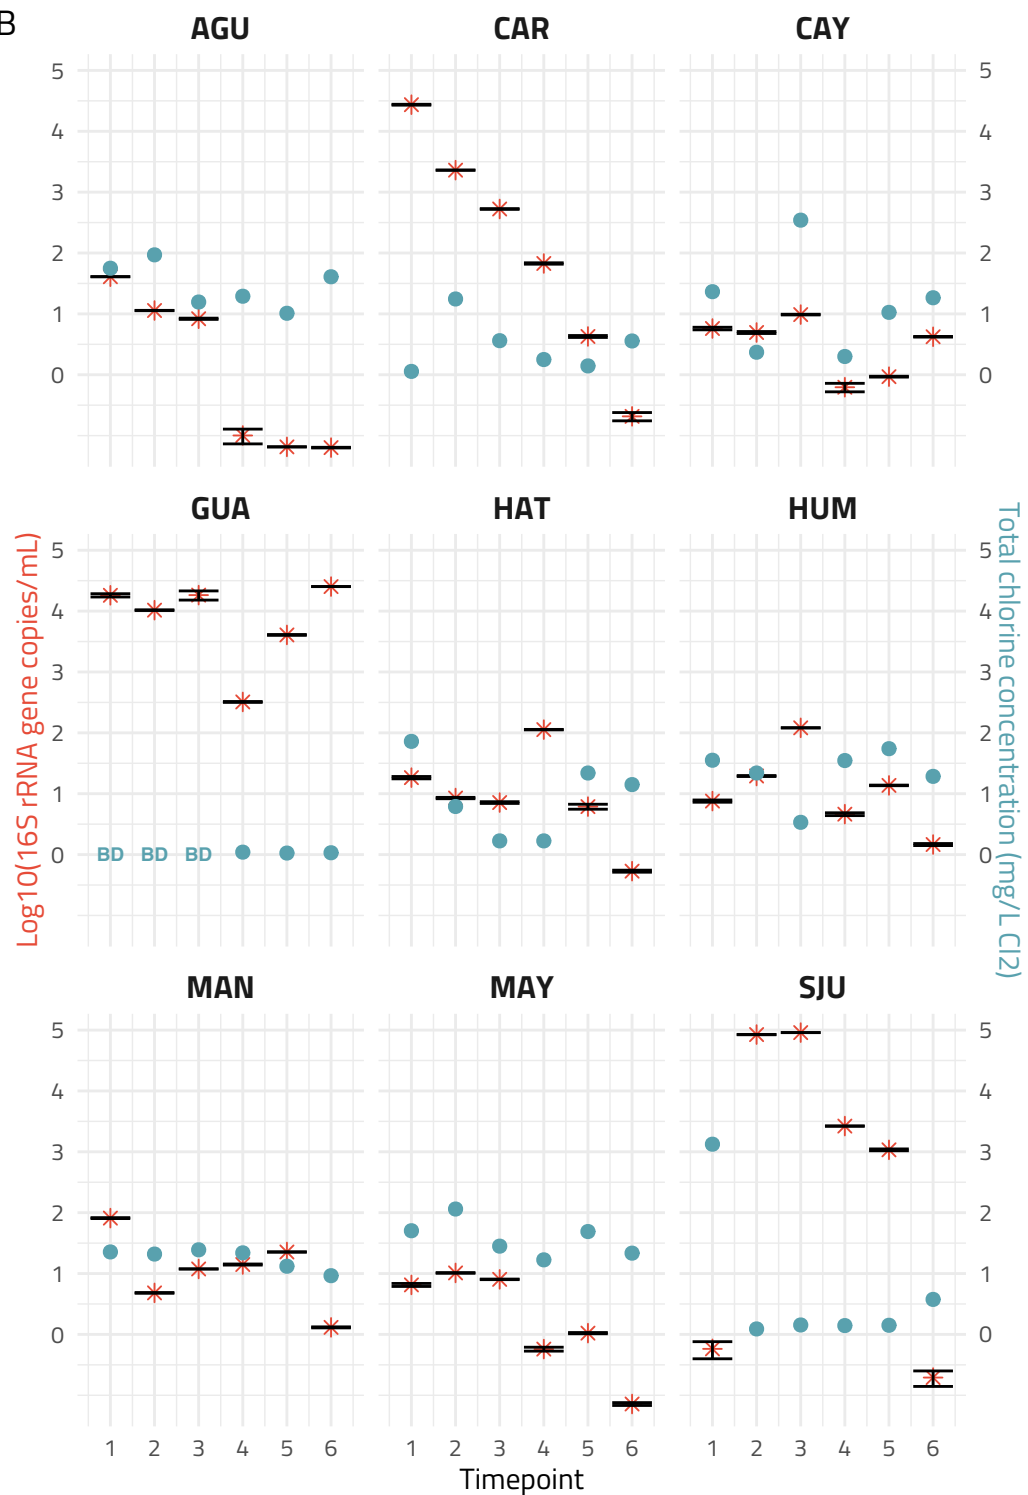

A

## Nonpareil curves per location

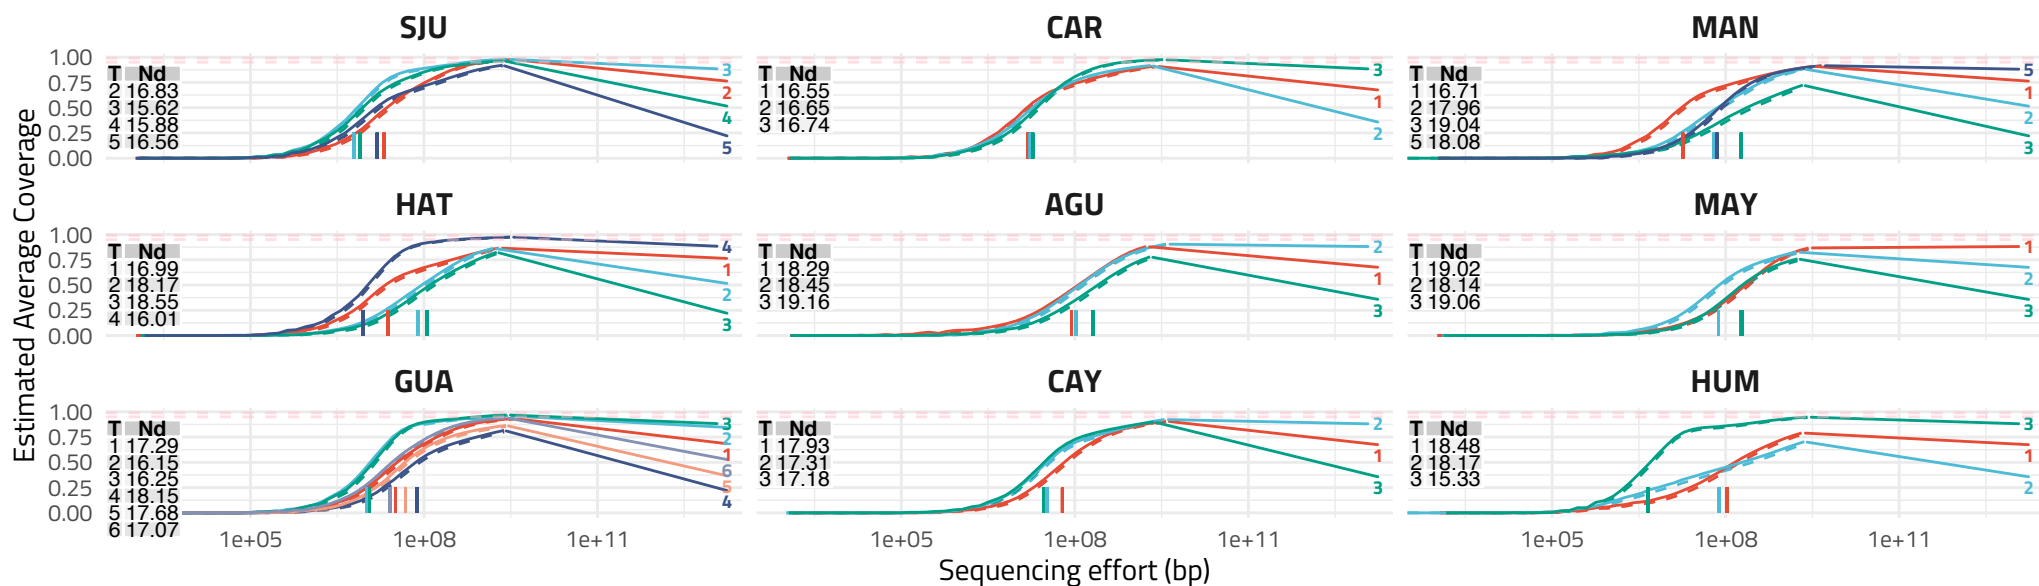

B

## Relative abundance of samples at domain level: Archaea, Bacteria, Eukaryota, Viruses, and Not Classified

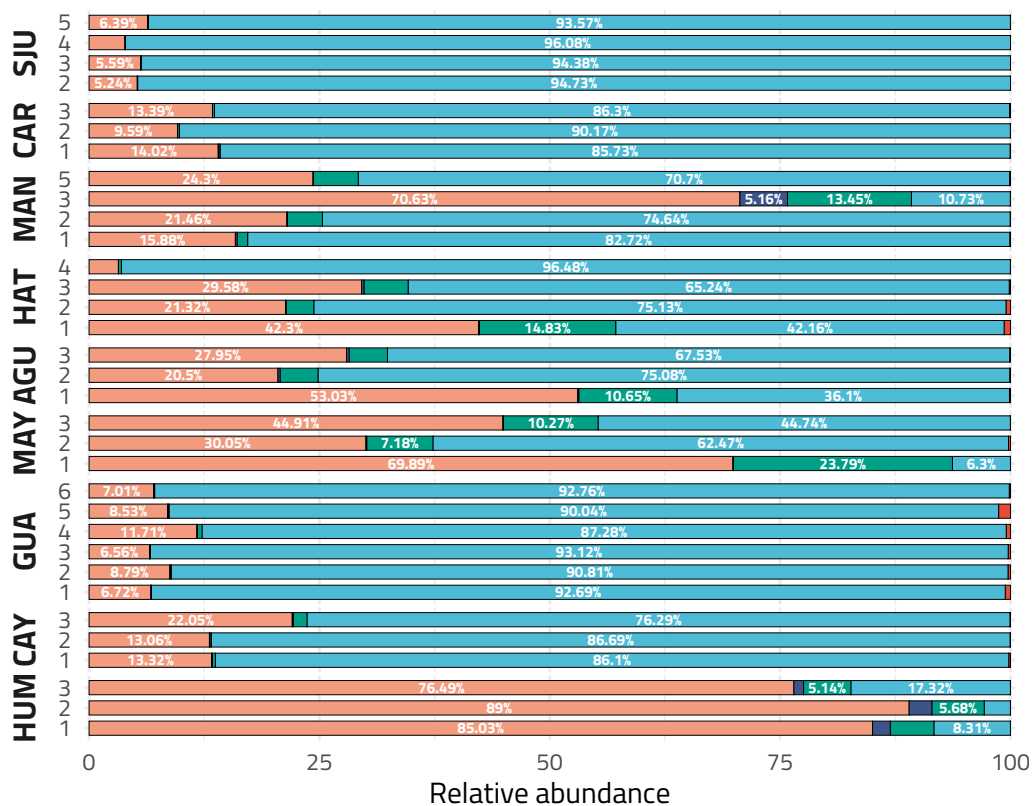

C

## Relative abundance of bacterial phyla per sample

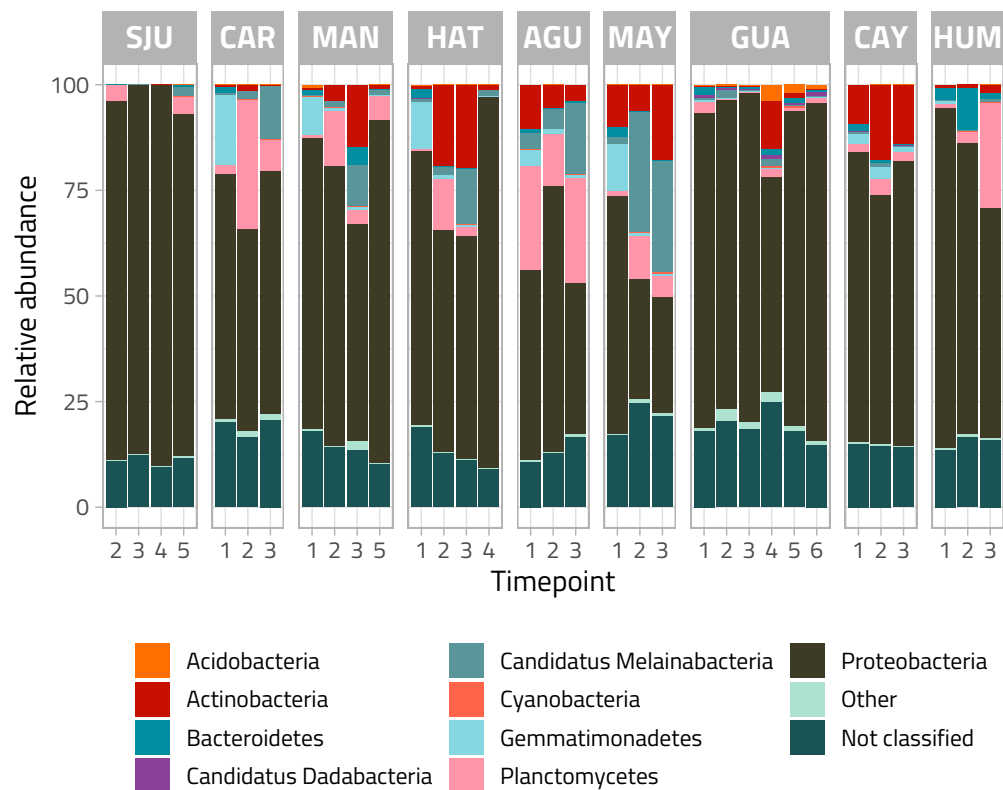

A

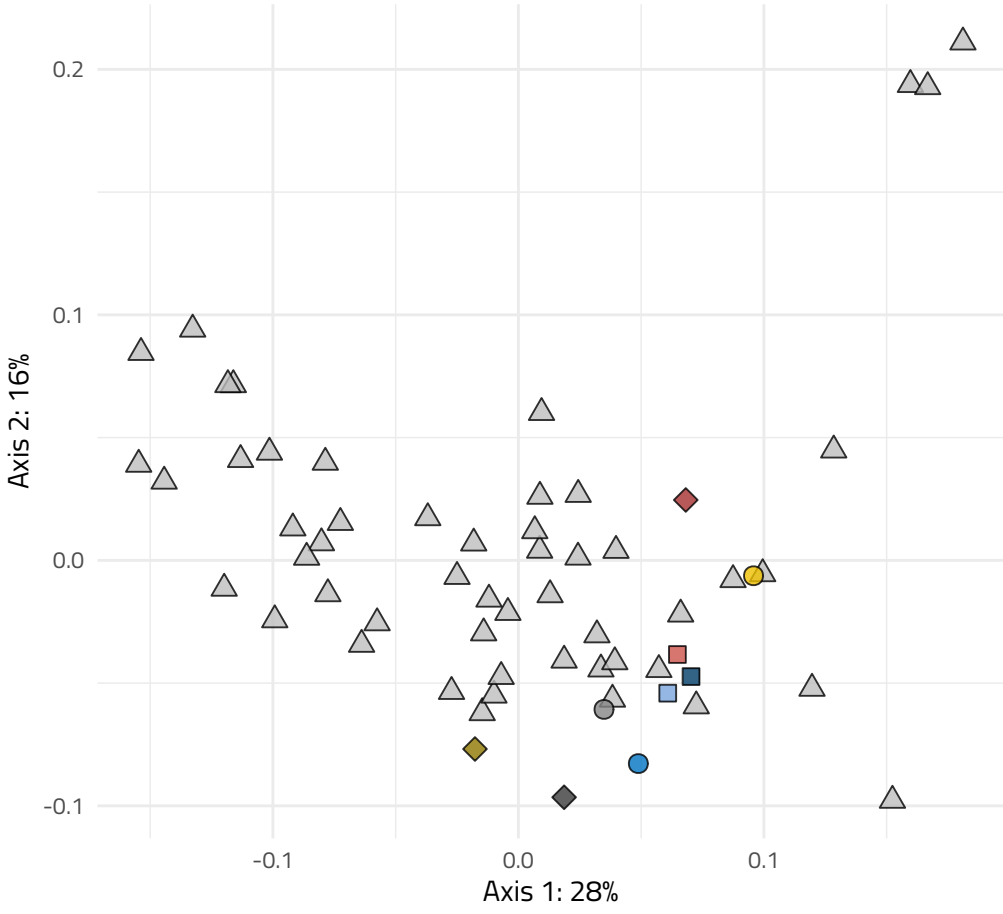

B

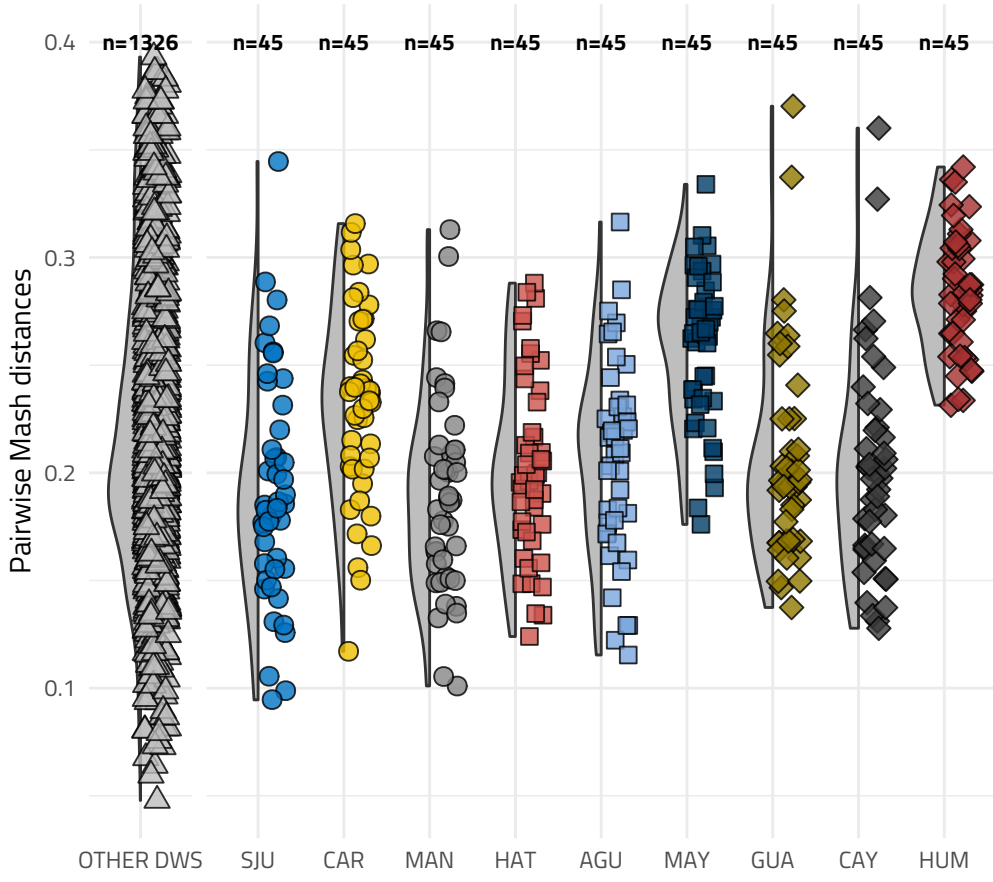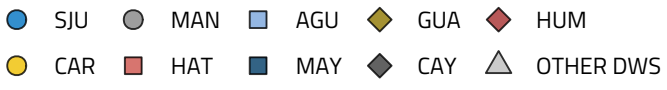

A

### Abundance of pathogen containing genera

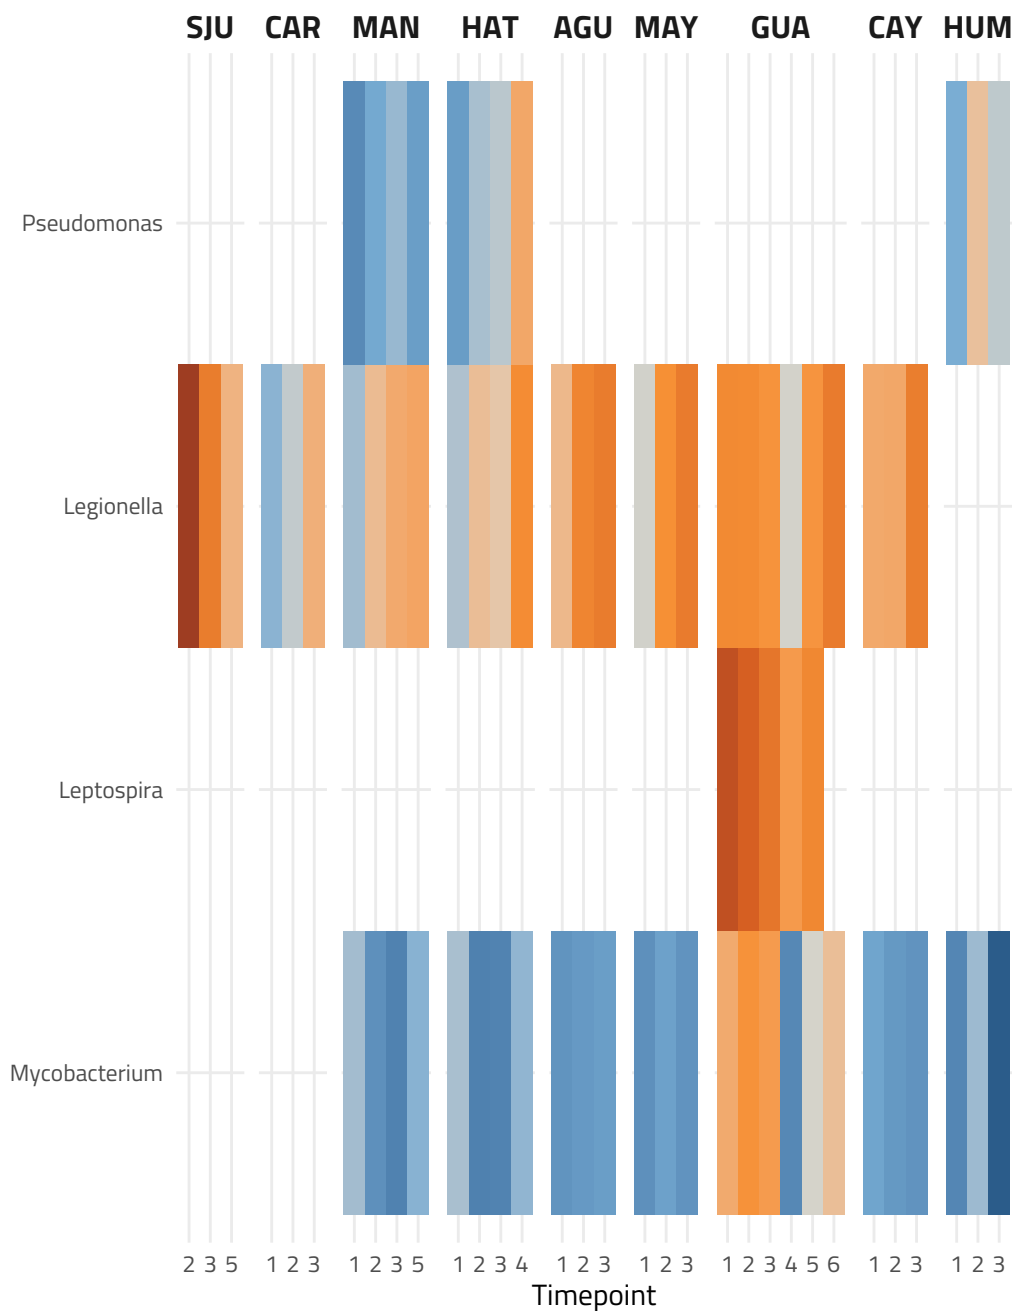

B

### Target copies normalized by 16S rRNA gene copies

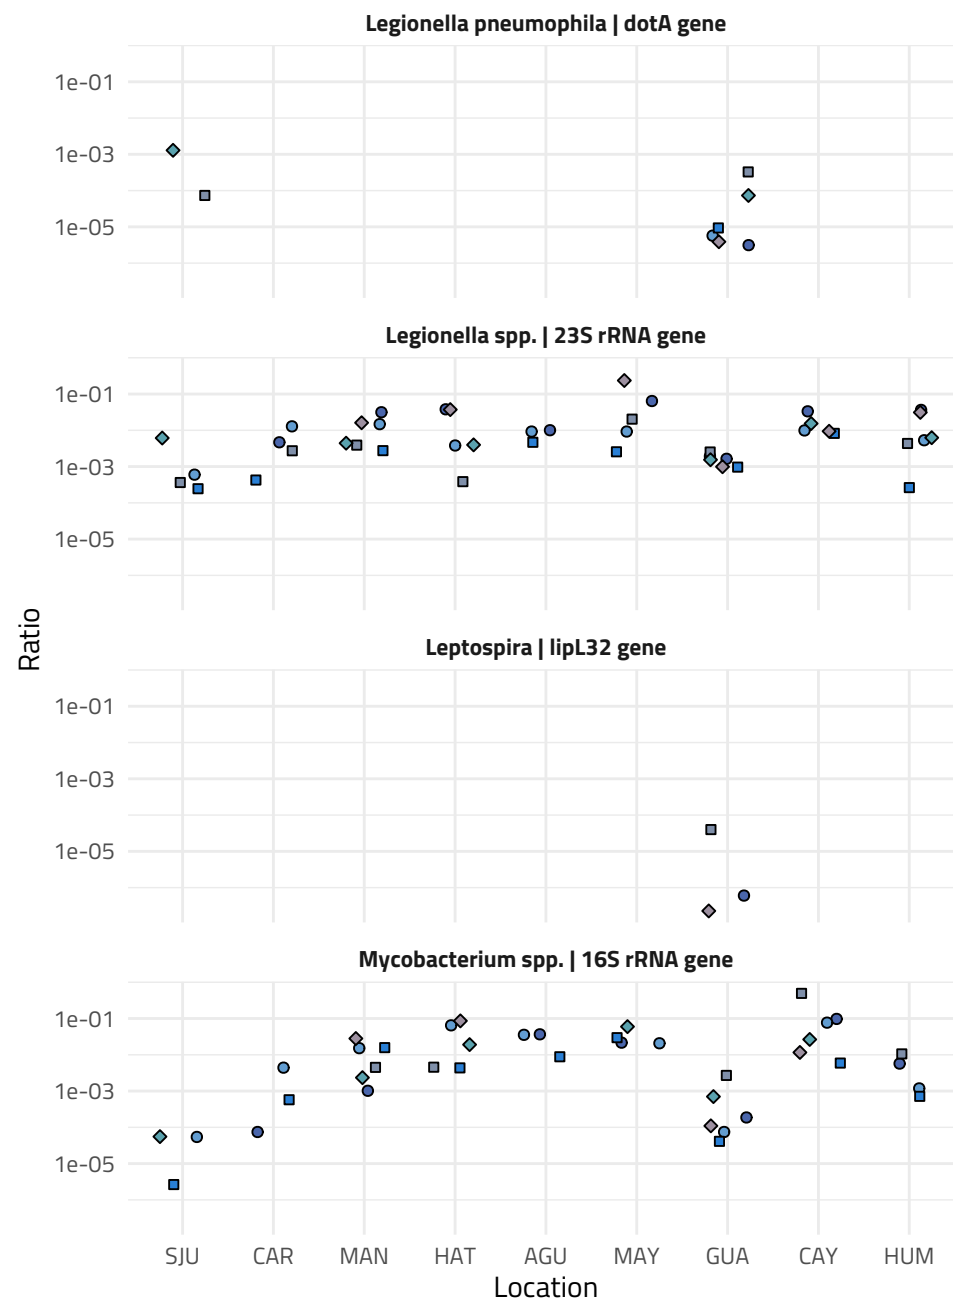

Timepoint ● 1 ● 2 ■ 3 ■ 4 ◆ 5 ◆ 6

0.1

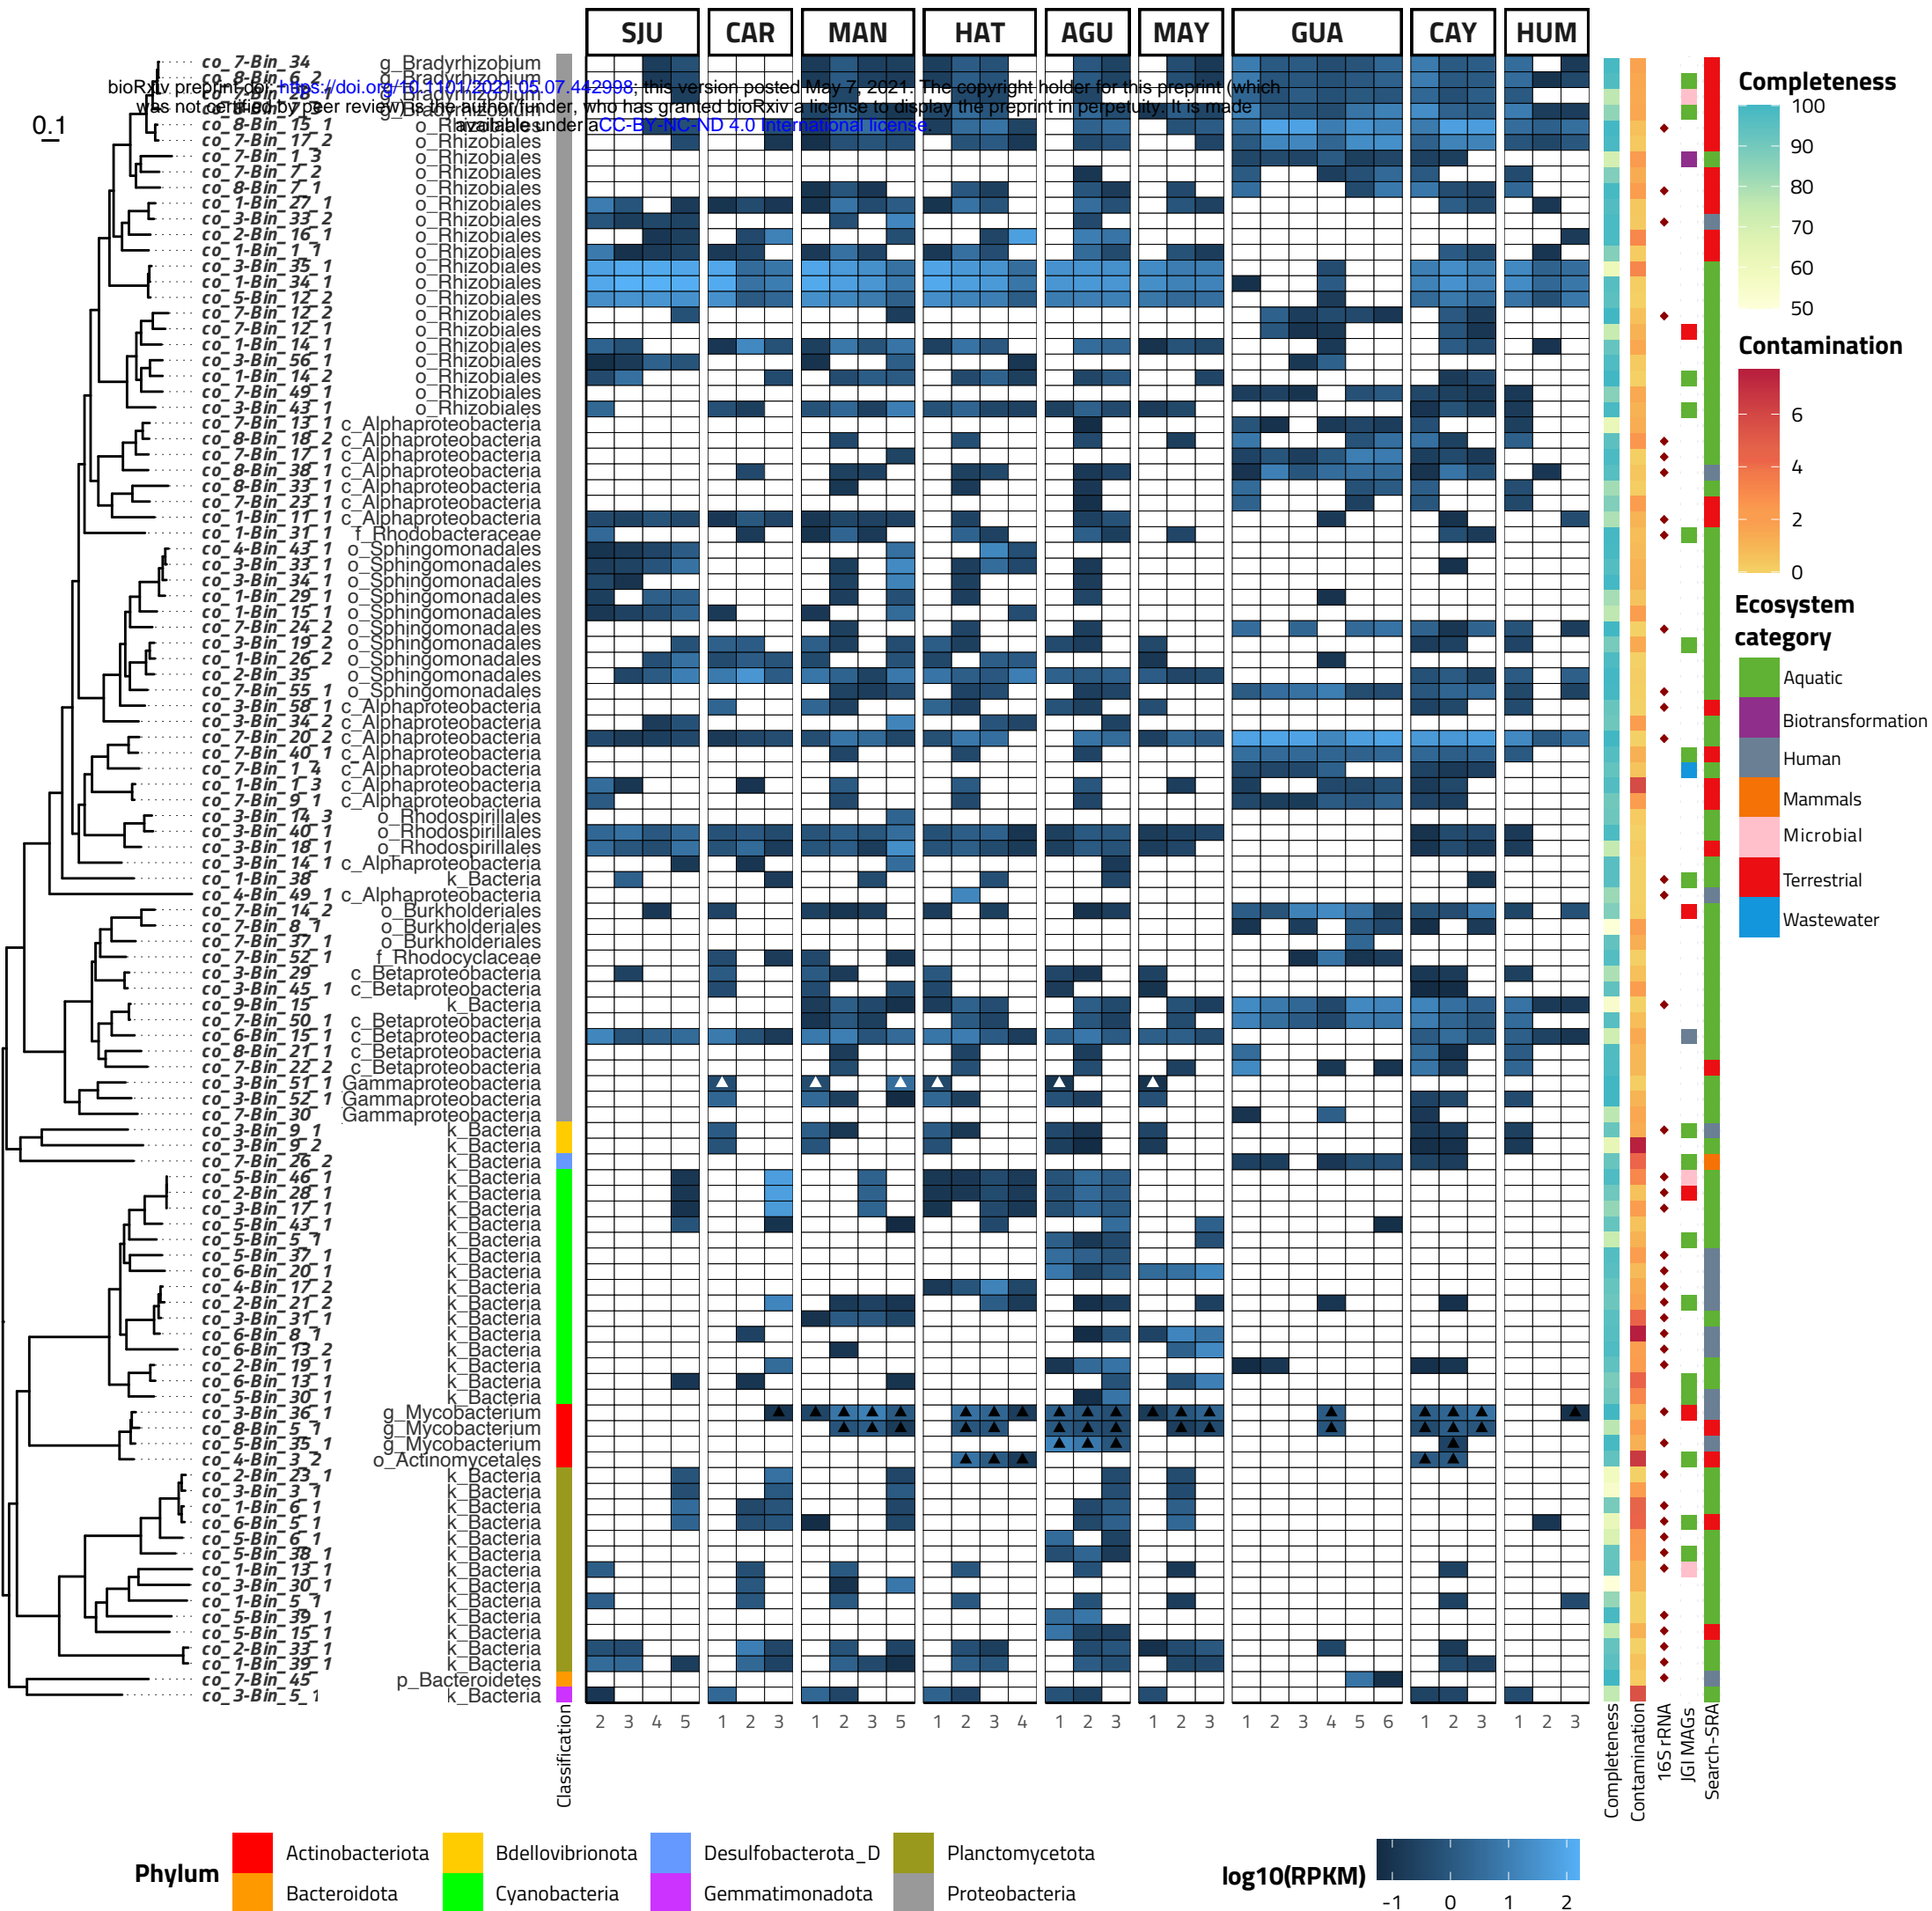

Source: https://www.biorxiv.org/content/10.1101/2021.05.07.442998v1.full.pdf
